# Supplementary material for: Ni(0)–Cu(i): a powerful combo catalyst for simultaneous coupling and cleavage of the C–N bond with cyclization to valuable amide-based pyrroles and 4-pyridones
Source: Royal Society of Chemistry journal article supplement (doi:10.1039/c5ra12115a), 2015-01-01

## Electronic Supplementary Information

### **Ni(0)-Cu(I): A powerful combo catalyst for simultaneous coupling and cleavage of C-N bond with cyclization to valuable amide-based pyrroles and 4-pyridones**

**Dipanwita Roy, Satinath Sarkar, Radha M. Laha, Nabyendu Pramanik and Dilip K. Maiti\***

Department of Chemistry, University of Calcutta, University College of Science,  
92, A. P. C. Road, Kolkata-700009, India

\*Corresponding author. Fax: 91-33-2351 9755, Tel: 91-33-2350 1014

*dkmchem@caluniv.ac.in*

| <u>Serial No.</u> | <u>Content</u>                                                                               | <u>Page Numbers</u> |
|-------------------|----------------------------------------------------------------------------------------------|---------------------|
| 1.                | Materials and methods                                                                        | S-2                 |
| 2.                | General procedure for synthesis of pentasubstituted pyrroles                                 | S-2                 |
| 3.                | Characterization data of pentasubstituted pyrrole derivatives ( <b>4a-4l</b> )               | S-2                 |
| 4.                | General procedure for synthesis of 4-pyridones                                               | S-8                 |
| 5.                | Characterization data of 4-pyridones ( <b>6a-6i</b> )                                        | S-9                 |
| 6.                | References                                                                                   | S-13                |
| 7.                | <sup>1</sup> H and <sup>13</sup> C-NMR spectra of pentasubstituted pyrroles ( <b>4a-4l</b> ) | S-14                |
| 8.                | <sup>1</sup> H and <sup>13</sup> C-NMR spectra of 4-pyridones ( <b>6d</b> )                  | S-26                |

## 1. Materials and methods

All reagents were purchased from commercial suppliers and used without further purification, unless otherwise specified. Commercially supplied ethyl acetate and petroleum ether (boiling range 60-80 °C) were distilled before use. Toluene was dried using sodium wires. Column chromatography was performed on silica gel (60-120 mesh, 0.120 mm-0.250 mm). Analytical thin layer chromatography was performed on 0.25 mm extra hard silica gel plates with UV254 fluorescent indicator. <sup>1</sup>H NMR and <sup>13</sup>C NMR spectra were recorded at ambient temperature using 300 MHz spectrometers (300 MHz for <sup>1</sup>H and 75 MHz for <sup>13</sup>C). Chemical shift is reported in ppm from internal reference tetramethylsilane and coupling constant in Hz. Proton multiplicities are represented as s (singlet), d (doublet), dd (double doublet), t (triplet), q (quartet), and m (multiplet). Infrared spectra were recorded on FT-IR spectrometer in thin film. HR-MS data were acquired by electron spray ionization technique on a Q-tof-micro quadrupole mass spectrophotometer.

## 2. General procedure for synthesis of pentasubstituted pyrroles

Acetoacetanilide derivative (2.0 mmol) and 1-aryl-2-propyn-1-ol derivative (1.0 mmol) were added in dry toluene (15 mL) in presence of bis(1,5-cyclooctadiene)nickel(0) (7 mol%, 21 mg), CuI (10 mol%, 19 mg) and cyclopentadiene (dimer) (0.3 mmol, 40 mg) and refluxed for 7-11 h in the inert condition under nitrogen atmosphere. The reaction was monitored by thin layer chromatography (TLC). The post-reaction mixture was filtered through cellite and filtrate was concentrated in a rotary evaporator through removal of toluene. The reduced mass was extracted with EtOAc (2x15 mL), and the combined organic layer was washed with water (3x10 mL) and brine (1x10 mL). It was dried over anhydrous Na<sub>2</sub>SO<sub>4</sub>, filtered and evaporated in a rotary evaporator under reduced pressure at room temperature. The crude product was purified by column chromatography on silica gel (60-120 mesh) with ethyl acetate-petroleum ether (10%, v/v) as an eluent, which afforded the corresponding pentasubstituted pyrroles (**4a-4l**).

## 3. Characterization data of pentasubstituted pyrroles (4a-4k)

### 3.1. 2,4-Dimethyl-N,1,5-triphenyl-1H-pyrrole-3-carboxamide (4a)

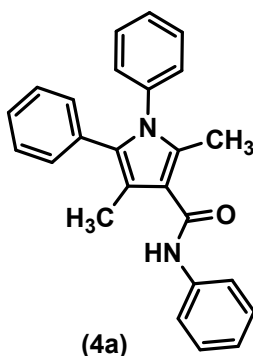

Yield: 62% (228 mg).

Characteristic: Yellow oil.

<sup>1</sup>H NMR (300 MHz, CDCl<sub>3</sub>): δ 1.88 (3H, s), 2.43 (3H, s), 6.78 (2H, d, *J* = 6.6), 6.89-6.92 (3H, m), 7.02-7.17 (5H, m), 7.17-7.23 (5H, m).

$^{13}\text{C}$  NMR (75 MHz,  $\text{CDCl}_3$ ):  $\delta$  11.7, 12.4, 117.0, 123.5, 125.6, 126.4, 127.0, 127.1, 128.0, 128.4, 129.0, 130.7, 131.2, 131.4, 132.8, 135.2, 136.0, 137.6, 165.8.

FT-IR (neat,  $\text{cm}^{-1}$ ): 1169, 1263, 1331, 1460, 1530, 1588, 2928, 3388.

HR-MS ( $m/z$ ) for  $\text{C}_{25}\text{H}_{23}\text{N}_2\text{O}$  ( $\text{M}+\text{H}$ ): Calculated 367.1810, found 367.1808.

### 3.2. 2,4-Dimethyl-5-phenyl-*N*,1-di-4-tolyl-1*H*-pyrrole-3-carboxamide (4b)

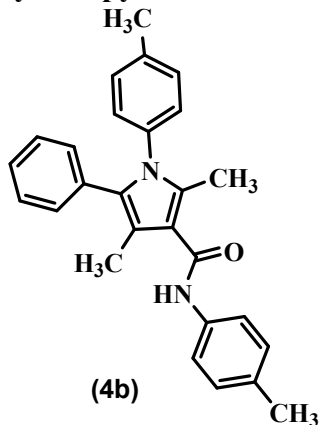

Yield: 66% (262 mg).

Characteristic: Yellow oil.

$^1\text{H}$  NMR (300 MHz,  $\text{CDCl}_3$ ):  $\delta$  1.90 (3H, s), 2.24 (3H, s), 2.40 (3H, s), 2.44 (3H, s), 6.98 (4H, s), 7.15 (2H, d,  $J = 8.1$  Hz), 7.31 (2H, d,  $J = 8.1$  Hz), 7.42-7.49 (5H, m).

$^{13}\text{C}$  NMR (75 MHz,  $\text{CDCl}_3$ ):  $\delta$  11.1, 12.5, 20.7, 21.1, 114.1, 119.1, 119.3, 126.4, 127.3, 128.0, 128.8, 129.1, 130.0, 131.0, 132.5, 135.1, 135.5, 136.1, 138.5, 163.9.

FT-IR (neat,  $\text{cm}^{-1}$ ): 1069, 1173, 1401, 1530, 1638, 2922, 3398.

HR-MS ( $m/z$ ) for  $\text{C}_{27}\text{H}_{27}\text{N}_2\text{O}$  ( $\text{M}+\text{H}$ ): Calculated 395.2123, found 395.2126.

### 3.3. *N*,1-Bis(4-ethylphenyl)-2,4-dimethyl-5-phenyl-1*H*-pyrrole-3-carboxamide (4c)

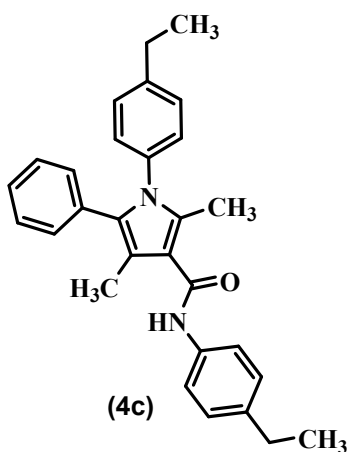

Yield: 68% (287 mg).

Characteristic: Pale yellow oil.

$^1\text{H}$  NMR (300 MHz,  $\text{CDCl}_3$ ):  $\delta$  1.19 (3H, t,  $J = 7.5$  Hz), 1.34 (3H, t,  $J = 7.2$  Hz), 1.92 (3H, s), 2.43 (3H, s), 2.56 (2H, q,  $J = 7.2$  Hz), 2.74 (2H, t,  $J = 7.5$  Hz), 7.02 (4H, d,  $J = 4.8$  Hz), 7.19-7.22 (2H, m), 7.35 (2H, d,  $J = 8.4$  Hz), 7.41-7.49 (5H, m).

$^{13}\text{C}$  NMR (75 MHz,  $\text{CDCl}_3$ ):  $\delta$  11.1, 12.5, 15.2, 15.6, 28.2, 28.5, 114.0, 119.2, 126.4, 127.3, 127.9, 128.0, 128.4, 128.7, 128.8, 131.0, 135.3, 135.6, 136.3, 139.0, 144.7, 163.9.

FT-IR (neat,  $\text{cm}^{-1}$ ): 1156, 1315, 1408, 1514, 1650, 2926, 3399.

HR-MS ( $m/z$ ) for  $\text{C}_{29}\text{H}_{31}\text{N}_2\text{O}$  ( $\text{M}+\text{H}$ ): Calculated 423.2436, found 423.2440.

### 3.4. *N*,1-Bis(4-methoxyphenyl)-2,4-dimethyl-5-phenyl-1*H*-pyrrole-3-carboxamide (4d)

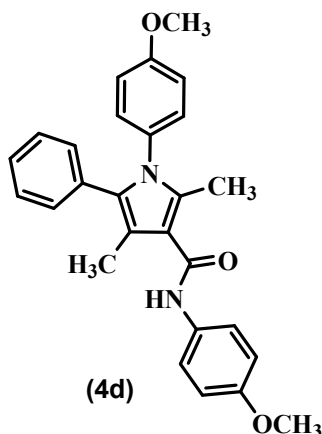

Yield: 80% (341 mg).

Characteristic: yellow oil.

$^1\text{H}$  NMR (300 MHz,  $\text{CDCl}_3$ ):  $\delta$  1.89 (3H, s), 2.39 (3H, s), 3.73 (3H, s), 3.84 (3H, s), 6.74 (2H, d,  $J = 9\text{Hz}$ ), 6.91 (1H, s), 7.00-7.03 (4H, m), 7.20 (2H, d,  $J = 9\text{Hz}$ ), 7.36-7.49 (4H, m).

$^{13}\text{C}$  NMR (75 MHz,  $\text{CDCl}_3$ ):  $\delta$  11.1, 12.4, 55.4, 55.5, 113.9, 114.5, 119.2, 120.8, 126.6, 127.2, 128.8, 129.2, 130.4, 130.9, 131.9, 135.2, 135.6, 155.6, 159.5, 163.9.

FT-IR (Neat,  $\text{cm}^{-1}$ ): 1029, 1171, 1247, 1510, 1650, 2852, 2923, 3406.

HR-MS ( $m/z$ ) for  $\text{C}_{27}\text{H}_{27}\text{N}_2\text{O}_3$  ( $\text{M}+\text{H}$ ): Calculated 427.2022, found 427.2020.

### 3.5. *N*,1-Bis(4-chlorophenyl)-2,4-dimethyl-5-phenyl-1*H*-pyrrole-3-carboxamide (4e)

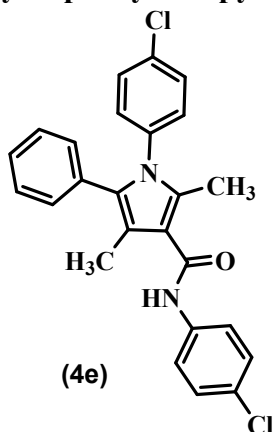

Yield: 72% (312 mg).

Characteristic: Yellow oil.

$^1\text{H}$  NMR (300 MHz,  $\text{CDCl}_3$ ):  $\delta$  1.89 (3H, s), 2.40 (3H, s), 7.02 (2H, d,  $J = 6.0\text{ Hz}$ ), 7.13 (2H, d,  $J = 6.0\text{ Hz}$ ), 7.21-7.24 (3H, m), 7.40-7.52 (6H, m).

$^{13}\text{C}$  NMR (75 MHz,  $\text{CDCl}_3$ ):  $\delta$  11.1, 12.5, 114.2, 119.7, 120.2, 126.4, 127.6, 127.9, 128.6, 129.0, 129.5, 129.7, 130.9, 134.7, 135.1, 135.4, 136.1, 137.1, 163.7.

FT-IR (neat,  $\text{cm}^{-1}$ ): 1240, 1289, 1308, 1402, 1493, 1592, 1660, 2923, 3399.

HR-MS ( $m/z$ ) for  $\text{C}_{25}\text{H}_{21}\text{Cl}_2\text{N}_2\text{O}$  ( $\text{M}+\text{H}$ ): Calculated 435.1031, found 435.1034 (One of the major peaks).

### 3.6. *N*,1-Bis(4-bromophenyl)-2,4-dimethyl-5-phenyl-1*H*-pyrrole-3-carboxamide (4f)

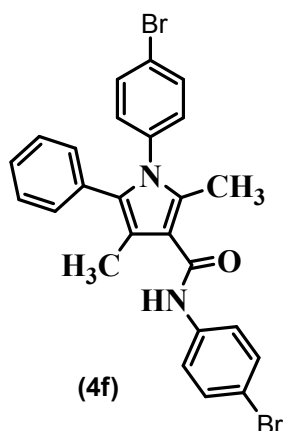

Yield: 68% (407 mg).

Characteristic: Yellow oil.

$^1\text{H}$  NMR (300 MHz,  $\text{CDCl}_3$ ):  $\delta$  1.97 (3H, s), 2.23 (3H, s), 6.49 (2H, d,  $J = 2.1\text{Hz}$ ), 6.95 (4H, d,  $J = 8.7\text{Hz}$ ), 7.35-7.53 (3H, m), 7.53-7.57 (4H, m).

$^{13}\text{C}$  NMR (75 MHz,  $\text{CDCl}_3$ ):  $\delta$  11.0, 12.5, 114.3, 119.4, 120.5, 125.6, 126.3, 127.4, 128.2, 128.4, 128.9, 129.3, 130.1, 137.0, 137.2, 137.4, 138.8, 139.1, 163.9.

FT-IR (Neat,  $\text{cm}^{-1}$ ): 1250, 1389, 1448, 1492, 1593, 1652, 1660, 2920, 3359.

HR-MS ( $m/z$ ) for  $\text{C}_{25}\text{H}_{21}\text{Br}_2\text{N}_2\text{O}$  ( $\text{M}+\text{H}$ ): Calculated 523.0021, found 523.0026 (One of the major peaks).

### 3.7. 2,4-Dimethyl-5-phenyl-*N*,1-di-3-tolyl-1*H*-pyrrole-3-carboxamide (4g)

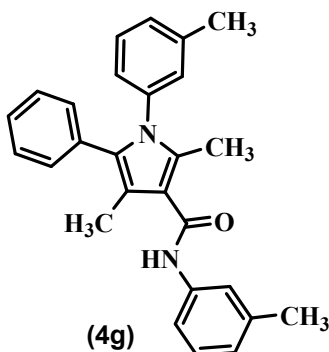

Yield: 64% (252 mg).

Characteristic: Yellow oil.

$^1\text{H}$  NMR (300 MHz,  $\text{CDCl}_3$ ):  $\delta$  1.98 (3H, s), 2.26 (3H, s), 2.36 (3H, s), 2.42 (3H, s), 6.90-7.02 (3H, m), 7.20-7.25 (2H, t,  $J = 8.1\text{Hz}$ ), 7.28-7.57 (4H, m), 7.58-7.60 (4H, m).

$^{13}\text{C}$  NMR (75 MHz,  $\text{CDCl}_3$ ):  $\delta$  11.4, 12.6, 20.4, 22.3, 115.5, 117.6, 124.2, 125.9, 126.7, 127.2, 127.4, 128.3, 128.7, 128.8, 129.1, 129.3, 130.8, 131.0, 131.4, 132.4, 135.5, 136.2, 137.4, 164.9.

FT-IR (Neat,  $\text{cm}^{-1}$ ): 1070, 1163, 1471, 1540, 1649, 2952, 3398.

HR-MS ( $m/z$ ) for  $\text{C}_{27}\text{H}_{27}\text{N}_2\text{O}$  ( $\text{M}+\text{H}$ ): Calculated 395.2123, found 395.2126.

### 3.8. *N*,1-Bis(3-methoxyphenyl)-2,4-dimethyl-5-phenyl-1*H*-pyrrole-3-carboxamide (4h)

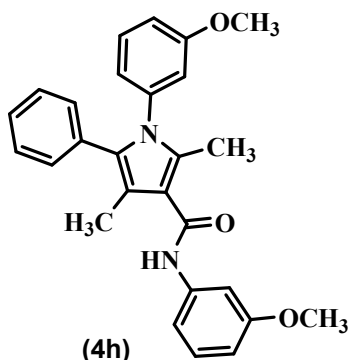

Yield: 82% (349 mg).

Characteristic: Yellow oil.

$^1\text{H}$  NMR (300 MHz,  $\text{CDCl}_3$ ):  $\delta$  1.92 (3H, s), 2.43 (3H, s), 3.73 (3H, s), 3.85 (3H, s), 6.46-6.54 (2H, m), 6.85 (1H, d,  $J = 9\text{Hz}$ ), 6.91 (1H, d,  $J = 9\text{Hz}$ ), 6.99-7.09 (4H, m), 7.39-7.45 (6H, m).

$^{13}\text{C}$  NMR (75 MHz,  $\text{CDCl}_3$ ):  $\delta$  11.0, 12.5, 55.2, 55.5, 104.5, 109.3, 11.3, 114.0, 114.1, 114.3, 119.4, 120.5, 126.4, 127.4, 128.5, 128.6, 128.9, 129.3, 130.1, 131.0, 135.2, 135.4, 138.8, 139.9, 159.9, 160.4, 164.0.

FT-IR (neat,  $\text{cm}^{-1}$ ): 1034, 1157, 1384, 1491, 1661, 1737, 2836, 2921, 3064, 3403.

HR-MS ( $m/z$ ) for  $\text{C}_{27}\text{H}_{27}\text{N}_2\text{O}_3$  ( $\text{M}+\text{H}$ ): Calculated 427.2022, found 427.2026.

### 3.9. *N*,1,5-*tris*(4-Chlorophenyl)-2,4-dimethyl-1*H*-pyrrole-3-carboxamide (4i)

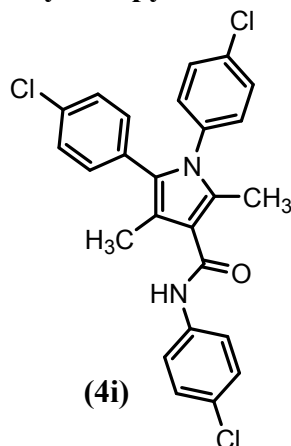

Yield: 70% (328 mg).

Characteristic: colourless oil.

$^1\text{H}$  NMR (300 MHz,  $\text{CDCl}_3$ ):  $\delta$  1.95 (3H, s), 2.44 (3H, s), 7.21-7.30 (4H, m), 7.44-7.49 (2H, m), 7.55-7.65 (3H, m), 7.74-7.81 (3H, m).

$^{13}\text{C}$  NMR (75 MHz,  $\text{CDCl}_3$ ):  $\delta$ . 11.5, 12.8, 119.1, 124.3, 126.2, 127.7, 128.2, 128.6, 129.8, 131.5, 132.2, 133.4, 133.7, 136.5, 137.8, 141.2, 166.3.

FT-IR (Neat,  $\text{cm}^{-1}$ ): 1097, 1160, 1365, 1390, 1589, 1660, 3030, 3478.

HR-MS ( $m/z$ ) for  $\text{C}_{25}\text{H}_{20}\text{Cl}_3\text{N}_2\text{O}$  ( $\text{M}+\text{H}$ ): Calculated 469.0641 found 468.06456 (One of the major peaks).

### 3.10. 2,4-dimethyl-*N*,1,5-trip-tolyl-1*H*-pyrrole-3-carboxamide (4j)

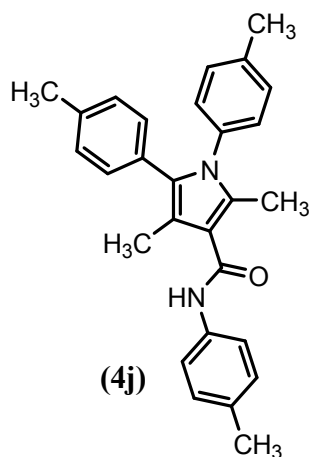

Yield: 55% (225 mg)

Characteristic: yellow oil

$^1\text{H}$  NMR (300 MHz,  $\text{CDCl}_3$ ):  $\delta$  1.90 (3H, s), 2.26 (3H, s), 2.35 (3H, s), 2.40 (3H, s), 2.46 (3H, s), 7.04-7.21 (6H, m), 7.38-7.54 (4H, m), 7.85 (2H, d,  $J = 6.6$  Hz).

$^{13}\text{C}$  NMR (75 MHz,  $\text{CDCl}_3$ ):  $\delta$  11.1, 12.2, 21.1, 22.1, 22.5, 119.3, 124.6, 127.8, 128.3, 128.4, 128.5, 129.9, 129.99, 131.5, 131.7, 132.3, 133.0, 133.5, 137.6, 141.2, 142.7, 163.9.

FT-IR (neat,  $\text{cm}^{-1}$ ): 1069, 1243, 1351, 1560, 1659, 2878, 3399

HR-MS ( $m/z$ ) for  $\text{C}_{28}\text{H}_{28}\text{N}_2\text{O}$ : Calculated 408.2206, found 409.2283 ( $\text{M}+\text{H}$ ) $^+$ .

### 3.11. 2,4,5-trimethyl-*N*,1-dip-tolyl-1*H*-pyrrole-3-carboxamide (4k)

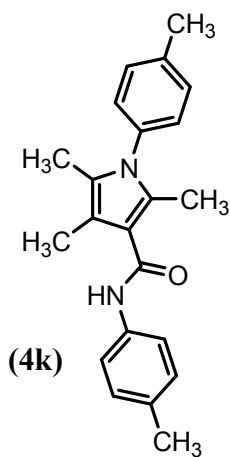

Yield: 44% (145 mg)

Characteristic: Yellow oil

$^1\text{H}$  NMR (300 MHz,  $\text{CDCl}_3$ ):  $\delta$  1.91 (3H, s), 2.22 (3H, s), 2.25 (3H, s), 2.41 (3H, s), 2.48 (3H, s), 7.11-7.27 (4H, m), 7.37 (2H, d,  $J = 8.1$  Hz), 7.62 (2H, d,  $J = 7.5$  Hz).

$^{13}\text{C}$  NMR (75 MHz,  $\text{CDCl}_3$ ):  $\delta$  11.2, 12.2, 12.8, 20.9, 22.2, 117.5, 119.9, 120.3, 123.0, 124.9, 125.2, 126.1, 126.4, 127.4, 128.1, 131.7, 131.8, 135.0, 166.3.

FT-IR (neat,  $\text{cm}^{-1}$ ): 1169, 1283, 1541, 1590, 1638, 2957, 3380.

HR-MS ( $m/z$ ) for  $\text{C}_{22}\text{H}_{24}\text{N}_2\text{O}$ : Calculated 332.1910, found 333.1970 ( $\text{M}+\text{H}$ ) $^+$ .

### 3.12. 2,4-dimethyl-1,5-diphenyl-*N-p*-tolyl-1*H*-pyrrole-3-carboxamide (4l)

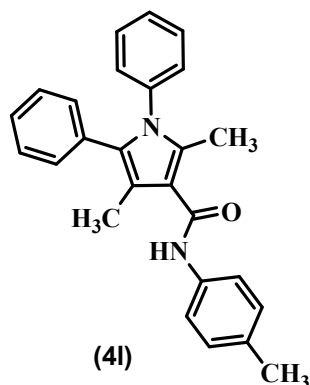

Yield: 15% (57 mg).

Characteristic: Pale yellow oil.

$^1\text{H}$  NMR (300 MHz,  $\text{CDCl}_3$ ):  $\delta$  1.91 (3H,s), 2.25 (3H,s), 2.41 (3H,s), 6.99-7.04 (2H, s), 7.08-7.16 (2H, m), 7.18-7.27 (4H, m), 7.29-7.45 (3H, m), 7.46-7.55 (3H, m).

$^{13}\text{C}$  NMR (75 MHz,  $\text{CDCl}_3$ ):  $\delta$ . 11.1, 12.5, 20.73, 119.1, 119.4, 123.1, 126.3, 126.4, 127.3, 127.4, 128.0, 128.3, 128.5, 128.6, 128.8, 128.9, 129.1, 129.4, 131.0, 132.6, 135.0, 135.2, 135.4, 136.1, 137.8, 163.9.

FT-IR (Neat,  $\text{cm}^{-1}$ ): 1058, 1115, 1298, 1334, 1512, 1640, 2956, 3399.

HR-MS ( $m/z$ ) for  $\text{C}_{26}\text{H}_{25}\text{N}_2\text{O}$  ( $\text{M}+\text{H}$ ): Calculated 381.1967, found 381.1969.

## 4. General procedure for synthesis of 4-pyridones

Acetoacetanilide derivative (2.0 mmol) was added in dry toluene (15 mL) containing bis(1,5-cyclooctadiene)nickel(0) (7 mol%, 21 mg), CuI (10mol%, 19 mg) and 2-methylfuran (0.3 mmol, 25 mg) and refluxed for 3.5-5 h in the inert condition under nitrogen atmosphere using a glove box. The reaction was monitored by thin layer chromatography (TLC). The post-reaction mixture was filtered through a sintered funnel and the filtrate was concentrated in rotary evaporator to remove toluene. The reduced mass was extracted with EtOAc (2x15 mL), and the combined organic layer was washed with water (3x10 mL) and brine (1x10 mL). It was dried over activated  $\text{Na}_2\text{SO}_4$ , filtered and evaporated in a rotary evaporator under reduced pressure at room temperature. The crude product was purified by column chromatography using silica gel (60-120 mesh) and ethyl acetate-petroleum ether (25%, v/v) as an eluent. The synthesized substituted pyridones (**6a-6i**) were characterized by means of NMR ( $^1\text{H}$  and  $^{13}\text{C}$ ), FT-IR and mass (HR-MS) spectral analyses and measuring melting points.

## 5. Characterization of the compounds synthesized following the above general procedure for the formation of substituted pyridone derivatives (6a-6i)

### 5.1. 2,6-Dimethyl-4-oxo-*N*,1-di-4-totyl-1,4-dihydropyridine-3-carboxamide (6a)<sup>1</sup>

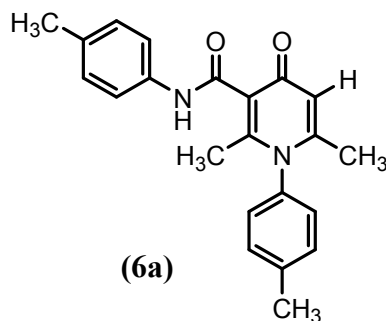

Yield: 81% (280 mg).

Characteristic: Colorless crystalline solid.

m.p.: 242-243 °C

<sup>1</sup>H NMR (300 MHz, CDCl<sub>3</sub>): δ 1.94 (3H, s), 2.33 (3H, s), 2.40 (3H, s), 2.52 (3H, s), 6.54 (1H, s), 7.07-7.15 (4H, m), 7.37 (2H, d, *J*=8.1 Hz), 7.60 (2H, d, *J*=8.4 Hz), 12.51 (1H, s).

<sup>13</sup>C NMR (75 MHz, CDCl<sub>3</sub>): δ. 20.7, 20.8, 21.1, 21.7, 118.7, 119.2, 120.7, 127.4, 129.2, 129.4, 130.9, 133.1, 136.4, 137.0, 140.2, 156.3, 164.0, 177.7.

FT-IR (KBr, cm<sup>-1</sup>): 1155, 1215, 1388, 1474, 1572, 1680, 3056, 3419

HR-MS (*m/z*) for C<sub>22</sub>H<sub>22</sub>N<sub>2</sub>O<sub>2</sub>: Calculated 346.1681, found 346.1682

### 5.2. 2,6-Dimethyl-4-oxo-*N*,1-diphenyl-1,4-dihydropyridine-3-carboxamide (6b)<sup>1</sup>

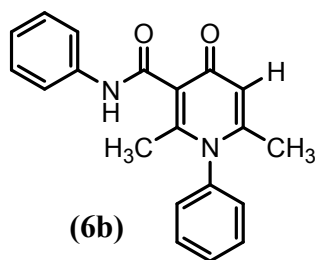

Yield: 74% (235 mg).

Characteristic: Colorless crystalline solid.

m.p.: 201-213 °C

<sup>1</sup>H NMR (300 MHz, CDCl<sub>3</sub>): δ 1.89 (3H, s), 2.49 (3H, s), 6.49 (1H, s), 7.02-7.07 (2H, m), 7.17-7.19 (2H, m), 7.20-7.32 (2H, m), 7.53-7.55 (2H, m), 7.58-7.70 (2H, m), 12.66 (1H, s).

<sup>13</sup>C NMR (75 MHz, CDCl<sub>3</sub>): δ. 20.8, 21.7, 118.8, 120.7, 123.6, 127.7, 128.7, 130.0, 130.4, 139.0, 139.5, 148.5, 156.2, 164.2, 177.9.

FT-IR (KBr, cm<sup>-1</sup>): 1090, 1215, 1399, 1484, 1592, 1675, 2656, 3369.

HR-MS (*m/z*) for C<sub>20</sub>H<sub>18</sub>N<sub>2</sub>O<sub>2</sub>: Calculated 318.1368, found 318.1371.

### 5.3. *N*,1-Bis(4-methoxyphenyl)-2,6-dimethyl-4-oxo-1,4-dihydropyridine-3-carboxamide (6c)<sup>1</sup>

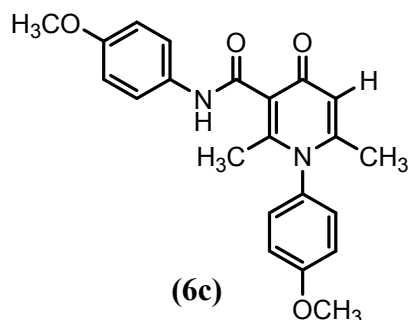

Yield: 82% (309 mg).

Characteristic: Colorless crystalline solid.

m.p.: 212-213 °C

<sup>1</sup>H NMR (300 MHz, CDCl<sub>3</sub>): δ 1.85 (3H, s), 2.44 (3H, s), 3.71 (3H, s), 3.80 (3H, s), 6.41 (1H, s), 6.77-6.81 (2H, m), 6.94-7.04 (4H, m), 7.52-7.56 (2H, m), 12.47 (1H, s).

<sup>13</sup>C NMR (75 MHz, CDCl<sub>3</sub>): δ 20.6, 21.7, 55.4, 55.6, 113.9, 115.3, 118.7, 118.9, 122.1, 128.7, 132.2, 148.9, 155.8, 156.6, 160.2, 163.9, 177.9.

FT-IR (Neat, cm<sup>-1</sup>): 1158, 1225, 1378, 1474, 1519, 1679, 2996, 3369

HR-MS (*m/z*) for C<sub>22</sub>H<sub>22</sub>N<sub>2</sub>O<sub>4</sub> : Calculated 378.1580, found 378.1585.

### 5.4 . *N*,1-bis(4-bromophenyl)-2,6-dimethyl-4-oxo-1,4-dihydropyridine-3-carboxamide(6d)

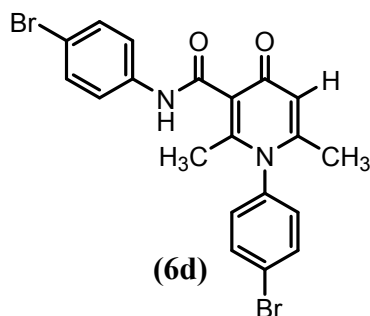

Yield: 78% (371 mg).

Characteristic: Colorless crystalline solid.

m.p.: 231-233 °C

<sup>1</sup>H NMR (300 MHz, CDCl<sub>3</sub>): δ 1.84 (3H, s), 2.43 (3H, s), 6.42 (1H, s), 7.00-7.05 (2H, m), 7.32-7.38 (2H, m), 7.50-7.55 (2H, m), 7.63-7.66 (2H, m), 12.71 (1H, s).

<sup>13</sup>C NMR (75 MHz, CDCl<sub>3</sub>): δ 20.7, 21.7, 116.0, 118.6, 119.0, 122.1, 124.3, 129.3, 131.6, 133.7, 138.0, 138.4, 148.1, 156.2, 163.9, 177.8.

FT-IR (KBr, cm<sup>-1</sup>): 1034, 1235, 1348, 1454, 1572, 1660, 2346, 3289.

HR-MS (*m/z*) for C<sub>20</sub>H<sub>16</sub>Br<sub>2</sub>N<sub>2</sub>O<sub>2</sub> : Calculated 473.9579, found 473.9576 (One of the major peaks).

**5.5. *N*,1-Bis(4-chlorophenyl)-2,6-dimethyl-4-oxo-1,4-dihydropyridine-3-carboxamide(6e)<sup>1</sup>**

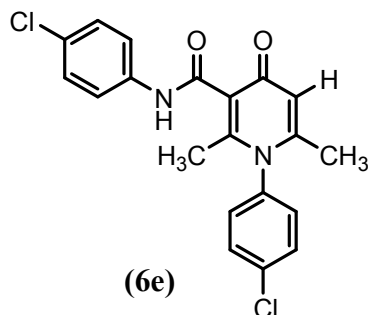

Yield: 77% (298 mg).

Characteristic: Colorless crystalline solid.

m.p.: 269-270 °C

<sup>1</sup>H NMR (300 MHz, CDCl<sub>3</sub>): δ 1.89 (3H, s), 2.49 (3H, s), 6.49, (1H, s), 7.22 (2H, d, *J* = 8.4 Hz), 7.29 (2H, d, *J* = 8.4 Hz), 7.59 (2H, d, *J* = 8.8 Hz), 7.68 (2H, d, *J* = 8.8 Hz), 12.92 (1H, s).

<sup>13</sup>C NMR (75 MHz, CDCl<sub>3</sub>): δ 20.7, 21.5, 119.6, 119.4, 121.4, 127.3, 128.3, 129.4, 131.7, 135.3, 138.6, 138.8, 149.3, 157.2, 165.0, 178.8.

FT-IR (KBr, cm<sup>-1</sup>): 1238, 1235, 1358, 1464, 1592, 1690, 2896, 3349.

HR-MS (*m/z*) for C<sub>20</sub>H<sub>16</sub>Cl<sub>2</sub>N<sub>2</sub>O<sub>2</sub> : Calculated 386.0589, found 386.0593 (One of the major peaks).

**5.6. *N*,1-Bis(2-chlorophenyl)-2,6-dimethyl-4-oxo-1,4-dihydropyridine-3-carboxamide (6f)<sup>1</sup>**

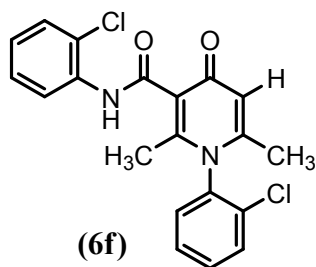

Yield: 75% (290 mg).

Characteristic: Colorless crystalline solid.

m.p.: 185-186 °C

<sup>1</sup>H NMR (300 MHz, CDCl<sub>3</sub>): δ 1.92 (3H, s), 2.52 (3H, s), 6.59 (1H, s), 7.00-7.05 (1H, m), 7.27-8.48 (1H, m), 7.40 (dd, *J* = 2.0, 5.6 Hz, 1H), 7.47 (dd, *J* = 1.2, 6.8 Hz, 1H), 7.50-7.55 (m, 2H), 7.67 (dd, *J* = 2.0, 6.0 Hz, 1H), 8.29 (dd, *J* = 1.2, 6.8 Hz, 1H), 13.06 (1H, s).

<sup>13</sup>C NMR (75 MHz, CDCl<sub>3</sub>): δ 19.4, 21.2, 118.6, 119.3, 123.6, 124.5, 124.7, 127.0, 127.8, 129.6, 129.8, 132.6, 133.6, 137.3, 139.1, 149.1, 155.5, 163.3, 179.1.

FT-IR (KBr, cm<sup>-1</sup>): 1239, 1239, 1363, 1474, 1584, 1680, 2856, 3369.

HR-MS (*m/z*) for C<sub>20</sub>H<sub>16</sub>Cl<sub>2</sub>N<sub>2</sub>O<sub>2</sub>: Calculated 386.0589, found 386.0594 (One of the major peaks).

**5.7. *N*,1-Bis(5-chlorophenyl-2-methoxyphenyl)-2,6-dimethyl-4-oxo-1,4-dihydropyridine-3-carboxamide (6g)<sup>1</sup>**

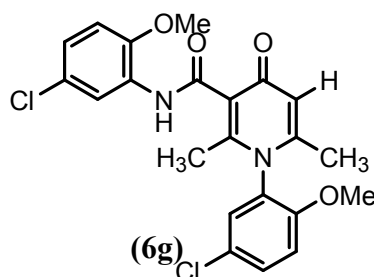

Yield: 74% (165 mg).

Characteristic: Colorless crystalline solid.

m.p.: 215-216 °C

<sup>1</sup>H NMR (300 MHz, CDCl<sub>3</sub>): δ 1.92 (3H, s), 2.52 (3H, s), 3.83 (3H, s), 3.96 (3H, s), 6.55 (1H, s), 6.82 (1H, d, *J* = 8.8 Hz), 7.00 (1H, dd, *J* = 2.4, 6.4 Hz), 7.05 (1H, d, *J* = 9.2 Hz), 7.20 (1H, d, *J* = 2.4 Hz), 7.50 (1H, dd, *J* = 2.4, 6.4 Hz), 8.61 (1H, d, *J* = 2.4 Hz), 12.98 (1H, s).

<sup>13</sup>C NMR (75 MHz, CDCl<sub>3</sub>): δ 19.6, 20.8, 56.2, 56.3, 110.7, 113.3, 118.9, 120.4, 122.5, 125.4, 126.2, 128.5, 128.8, 129.8, 131.6, 147.8, 148.4, 153.1, 156.5, 164.1, 178.1.

FT-IR (KBr, cm<sup>-1</sup>): 1025, 1136, 1179, 1424, 1499, 1736, 1680, 2946, 3509.

HR-MS (*m/z*) for C<sub>22</sub>H<sub>20</sub>Cl<sub>2</sub>N<sub>2</sub>O<sub>2</sub>: Calculated 446.0800, found 446.0803 (One of the major peaks).

**5.8. *N*,1-Bis(2-methoxyphenyl)-2,6-dimethyl-4-oxo-1,4-dihydropyridine-3-carboxamide (6h)<sup>1</sup>**

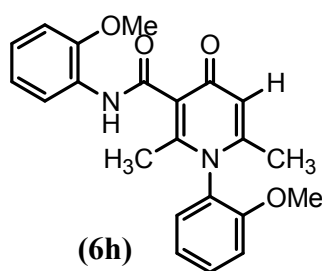

Yield: 81% (154 mg).

Characteristic: Colorless crystalline solid.

m.p.: 240-242 °C

<sup>1</sup>H NMR (300 MHz, CDCl<sub>3</sub>): δ 1.86 (3H, s), 2.47 (3H, s), 3.80 (3H, s), 3.96 (3H, s), 6.51 (1H, s), 6.95-6.90 (2H, m), 7.10-7.13 (4H, m), 7.48-7.50 (1H, m), 8.51 (1H, d, *J* = 7.6 Hz), 12.75 (1H, s).

<sup>13</sup>C NMR (75 MHz, CDCl<sub>3</sub>): δ 19.6, 20.9, 55.8, 55.9, 110.2, 112.4, 118.7, 119.3, 120.6, 120.8, 121.6, 123.2, 128.0, 128.8, 128.9, 131.6, 148.8, 149.3, 154.3, 156.5, 164.3, 178.0.

FT-IR (KBr, cm<sup>-1</sup>): 1020, 1124, 1276, 1345, 1461, 1599, 1668, 2966, 3629.

HR-MS (*m/z*) for C<sub>22</sub>H<sub>22</sub>N<sub>2</sub>O<sub>4</sub>: Calculated 378.1580, found 378.1582.

**5.9. Ethyl 4-(1-(ethoxycarbonyl)phenyl)-2,6-dimethyl-4-oxo-1,4-dihydropyridine-3-carboxamidobenzoate (6i)<sup>1</sup>**

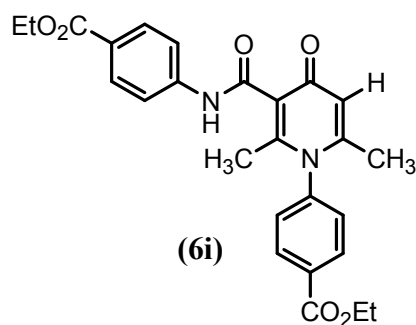

Yield: 79% (183 mg).

Characteristic: Colorless crystalline solid.

m.p.: 180-181 °C

<sup>1</sup>H NMR (300 MHz, CDCl<sub>3</sub>): δ 1.40 (3H, t, J = 7.2 Hz), 1.44 (3H, t, J = 7.2 Hz), 1.92 (3H, s), 2.52 (3H, s), 4.34 (2H, q, J = 7.2 Hz), 4.45 (2H, q, J = 7.2 Hz), 6.52 (1H, s), 7.35 (2H, d, J = 8.4 Hz), 7.78 (2H, d, J = 8.8 Hz), 8.00 (2H, d, J = 8.8 Hz), 8.28 (2H, d, J = 8.4 Hz), 13.14 (1H, s).

<sup>13</sup>C NMR (75 MHz, CDCl<sub>3</sub>): δ 14.3, 20.9, 21.8, 60.6, 61.8, 118.4, 119.2, 119.6, 125.1, 128.0, 130.0, 131.8, 132.3, 143.0, 143.1, 148.1, 156.4, 164.3, 164.8, 166.5, 178.0.

FT-IR (KBr, cm<sup>-1</sup>): 1042, 1199, 1444, 1521, 1677, 2400, 3060, 3665.

HR-MS (*m/z*) for C<sub>26</sub>H<sub>26</sub>N<sub>2</sub>O<sub>6</sub>: Calculated 462.1791, found 462.1789.

## 6. References

1. Z. Zhang, S. Fang, Q. Liu and G. Zhang, *J. Org. Chem.*, 2012, **77**, 7665;

## 7. $^1\text{H}$ and $^{13}\text{C}$ -NMR spectra of the compounds (4a-4l)

**SI Figure 1:**  $^1\text{H}$  and  $^{13}\text{C}$ -NMR spectra of compound **4a**

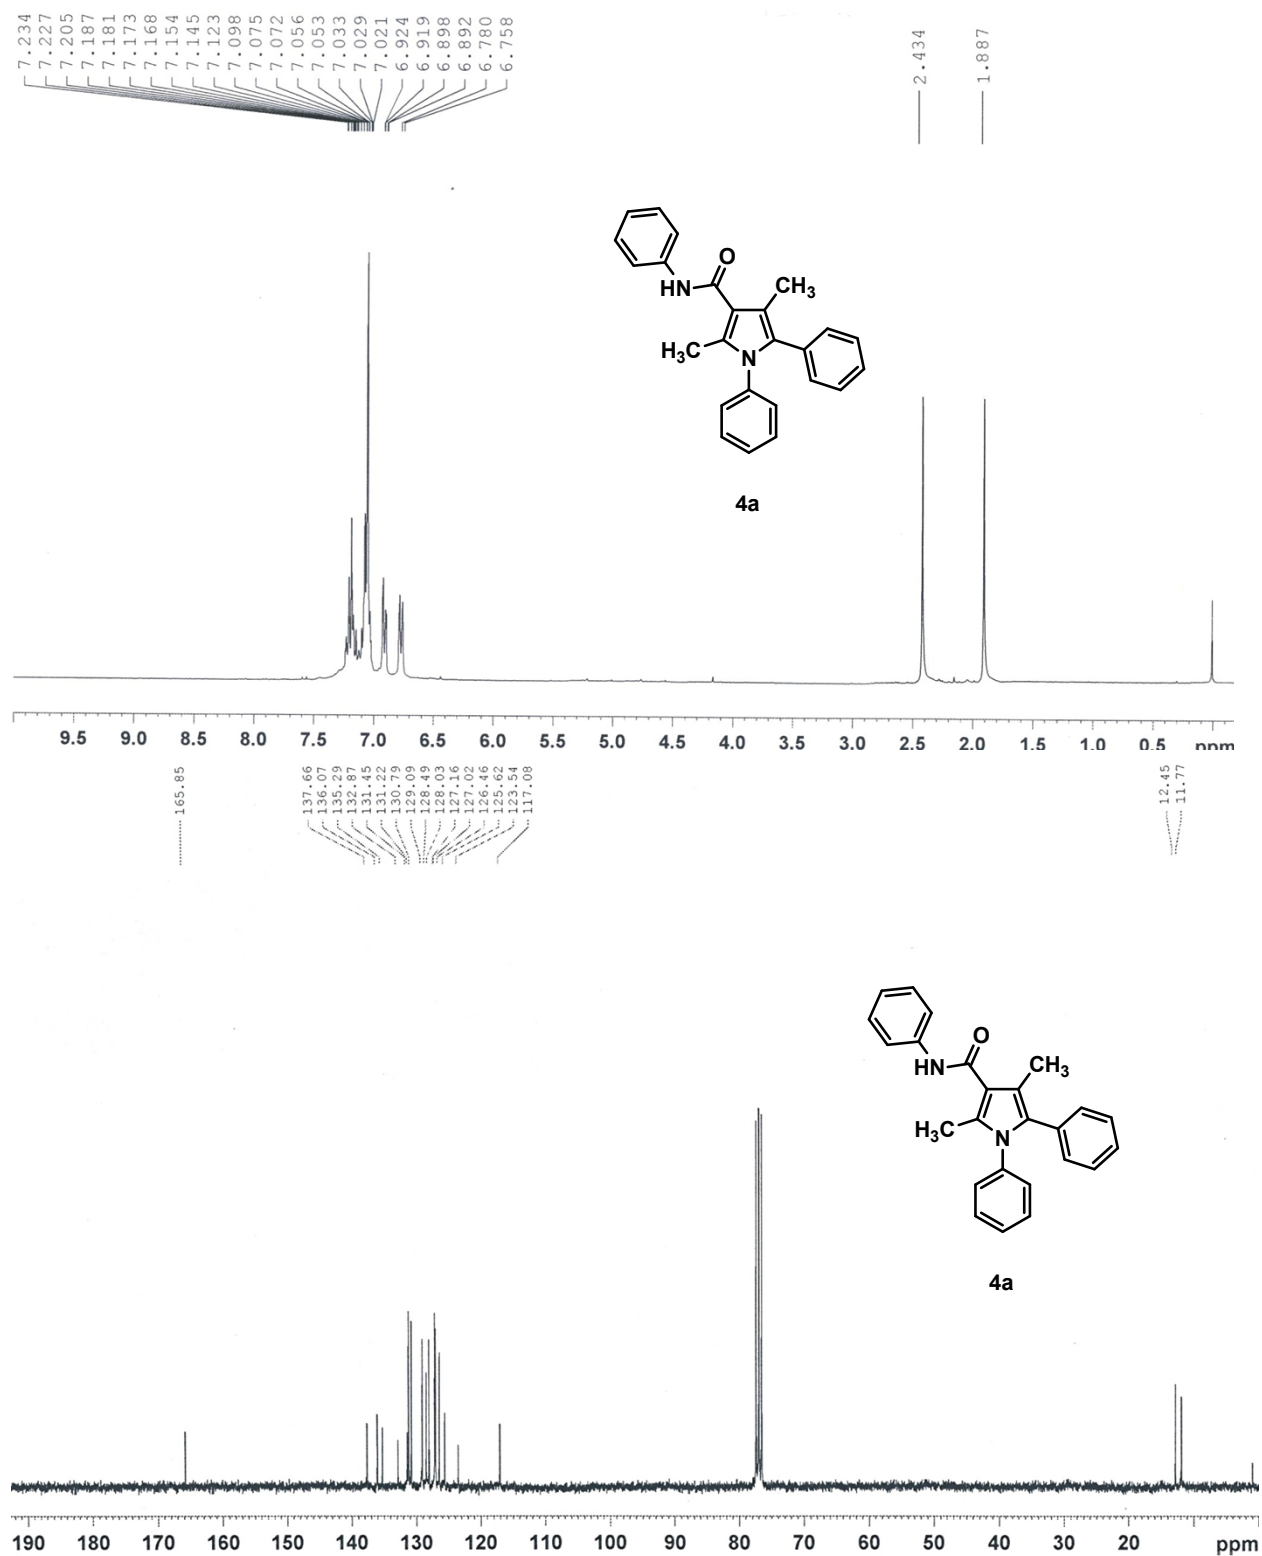

SI Figure 2:  $^1\text{H}$  and  $^{13}\text{C}$ -NMR spectra of compound **4b**

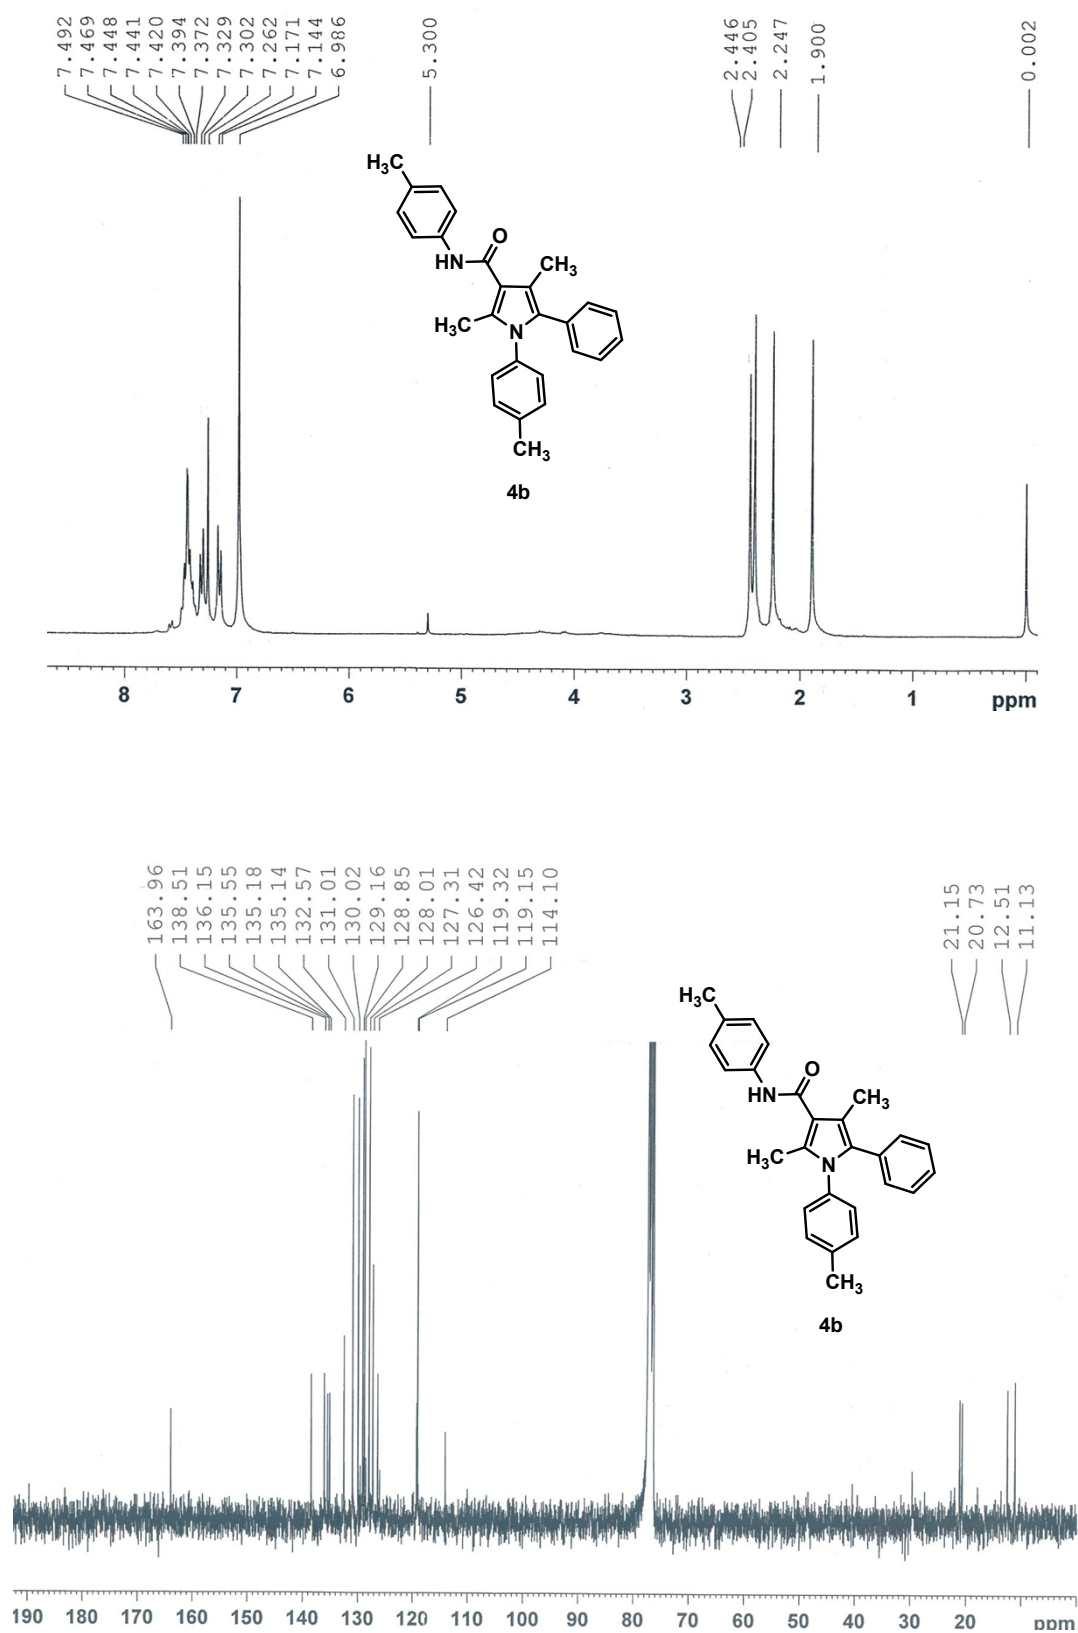

SI Figure 3:  $^1\text{H}$  and  $^{13}\text{C}$ -NMR spectra of compound **4c**

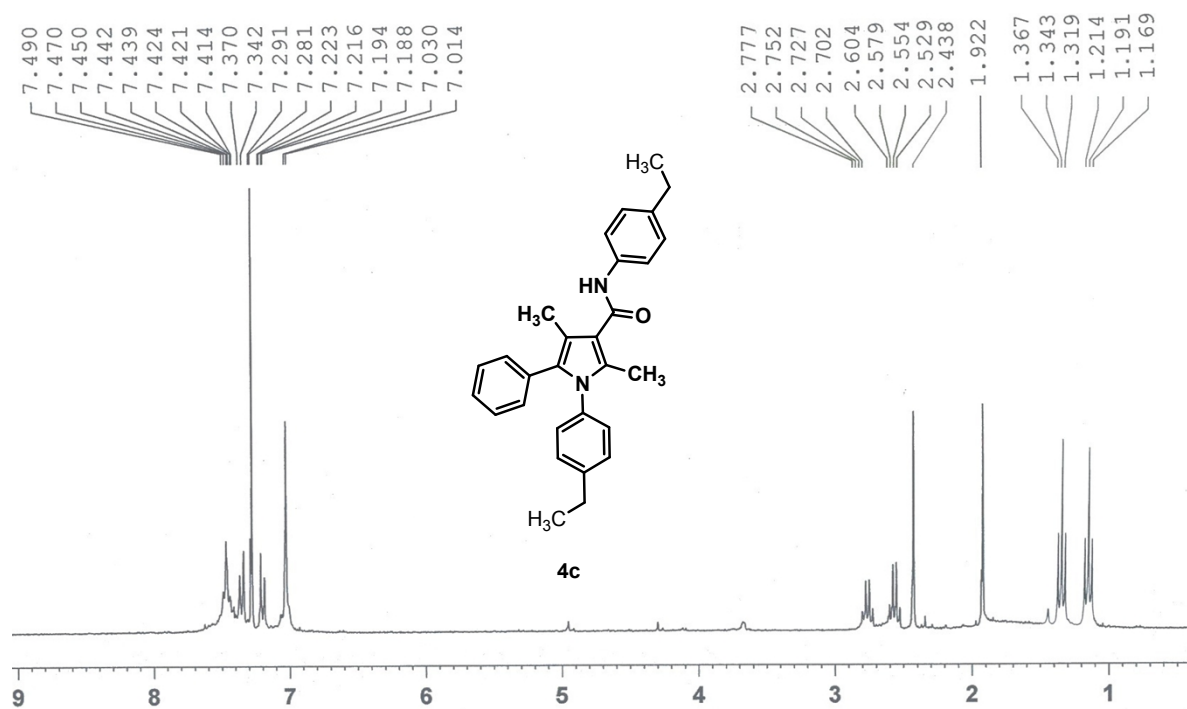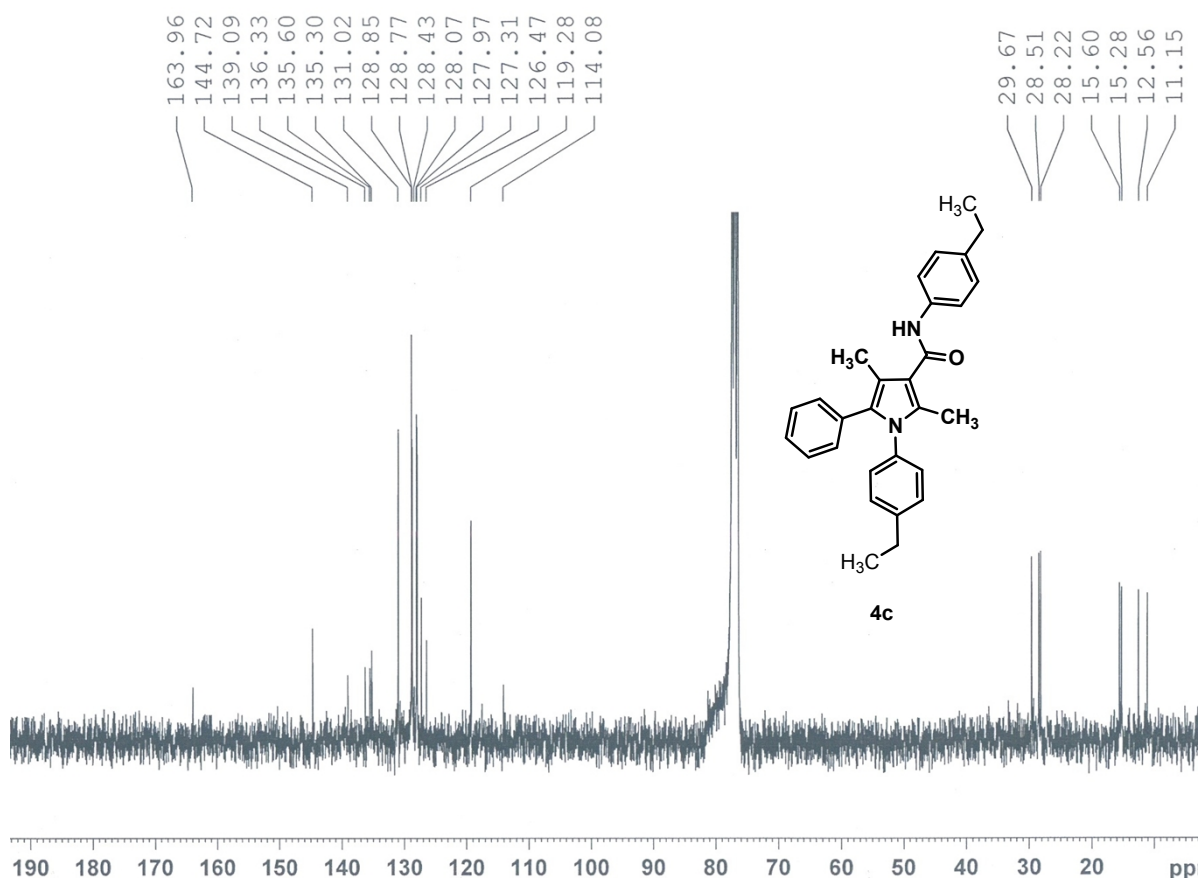

SI Figure 4:  $^1\text{H}$  and  $^{13}\text{C}$ -NMR spectra of compound **4d**

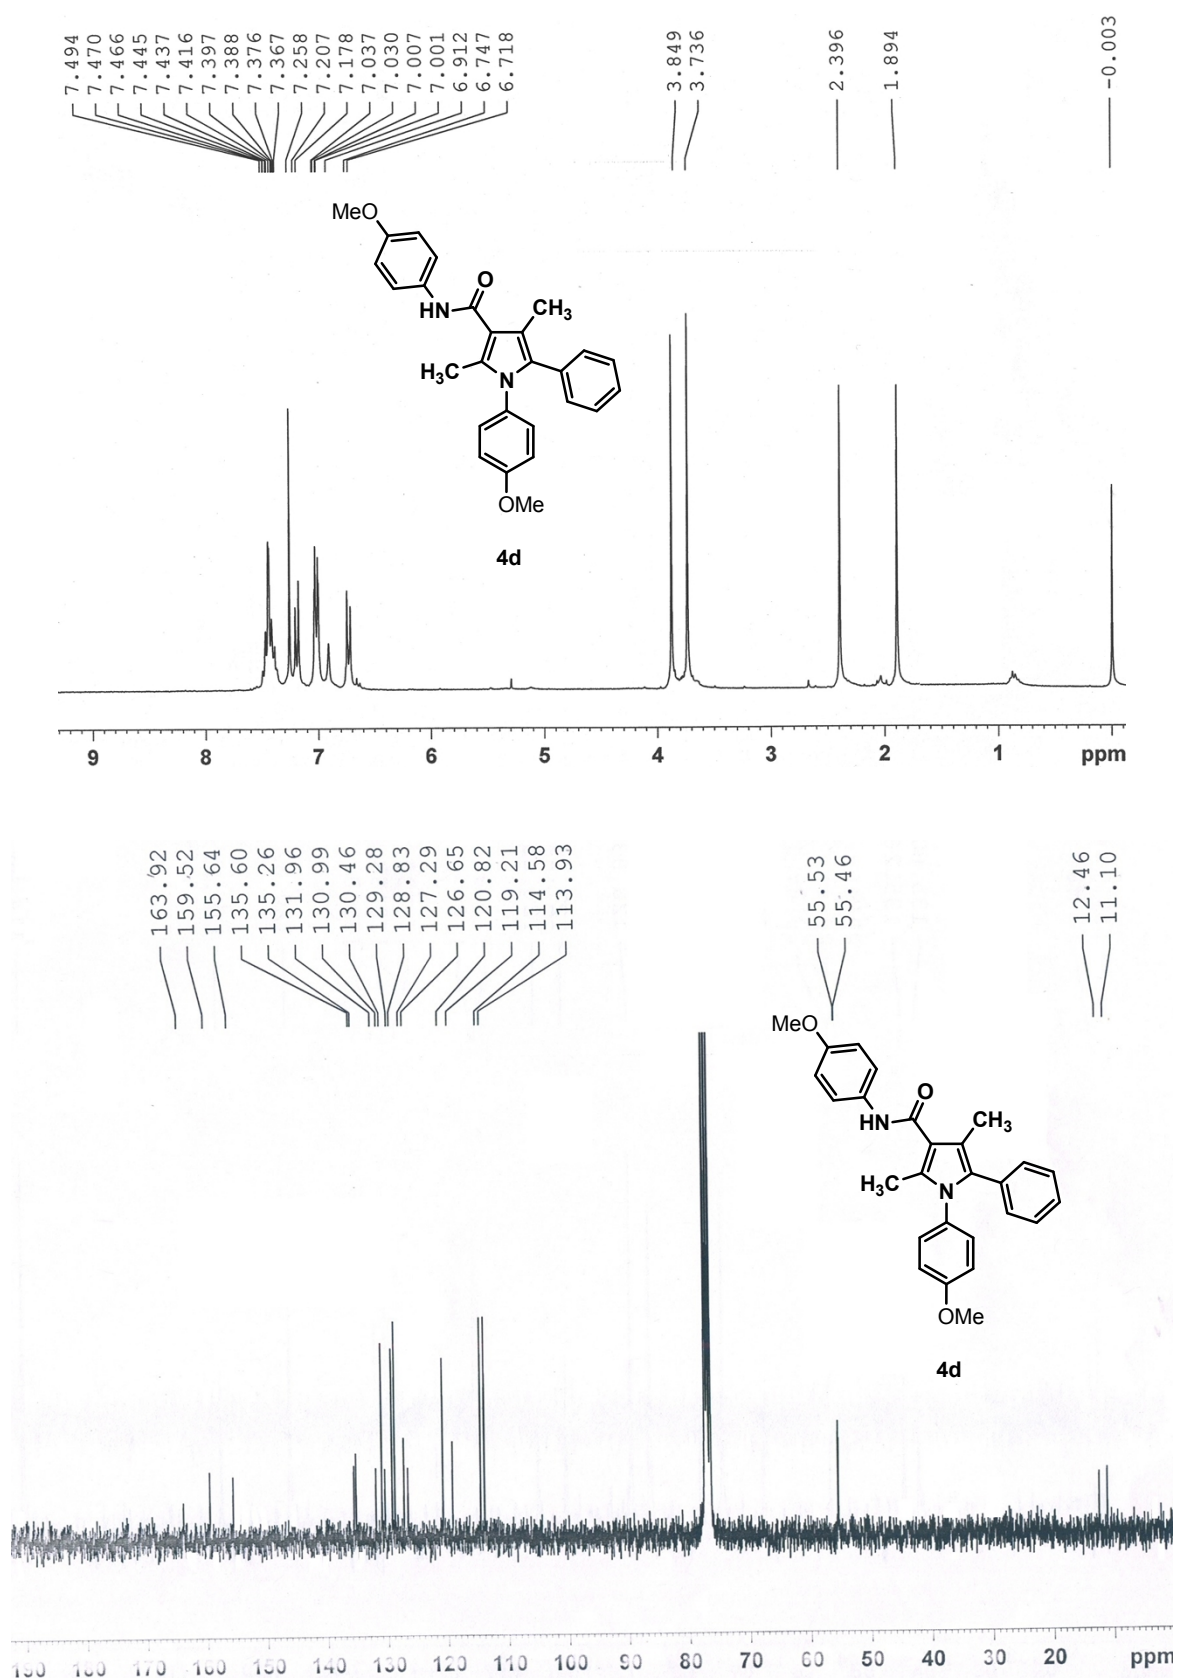

**SI Figure 5:**  $^1\text{H}$  and  $^{13}\text{C}$ -NMR spectra of compound **4e**

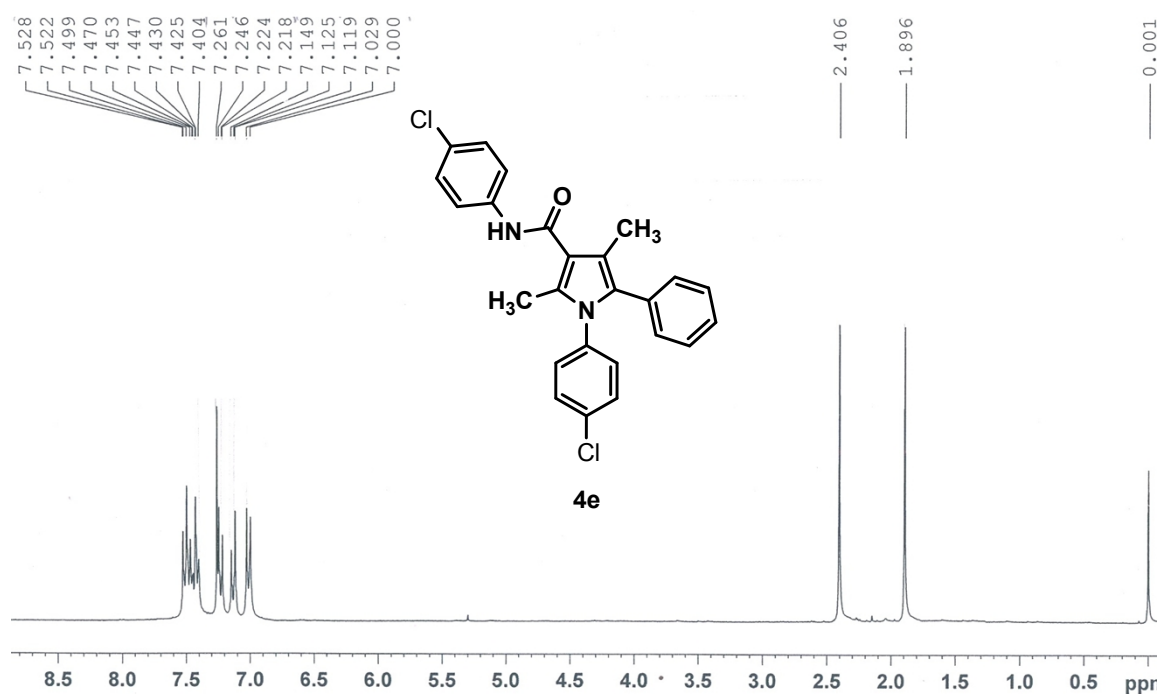

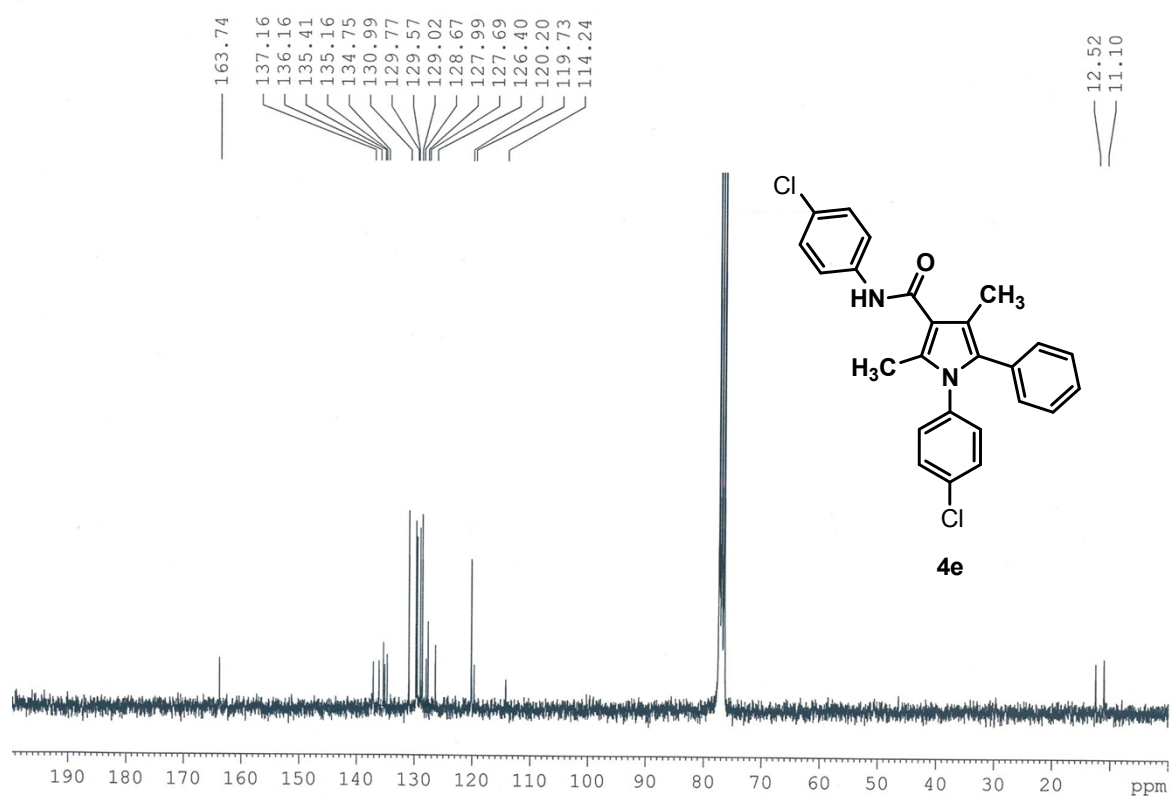

**SI Figure 6: <sup>1</sup>H and <sup>13</sup>C-NMR spectra of compound 4f**

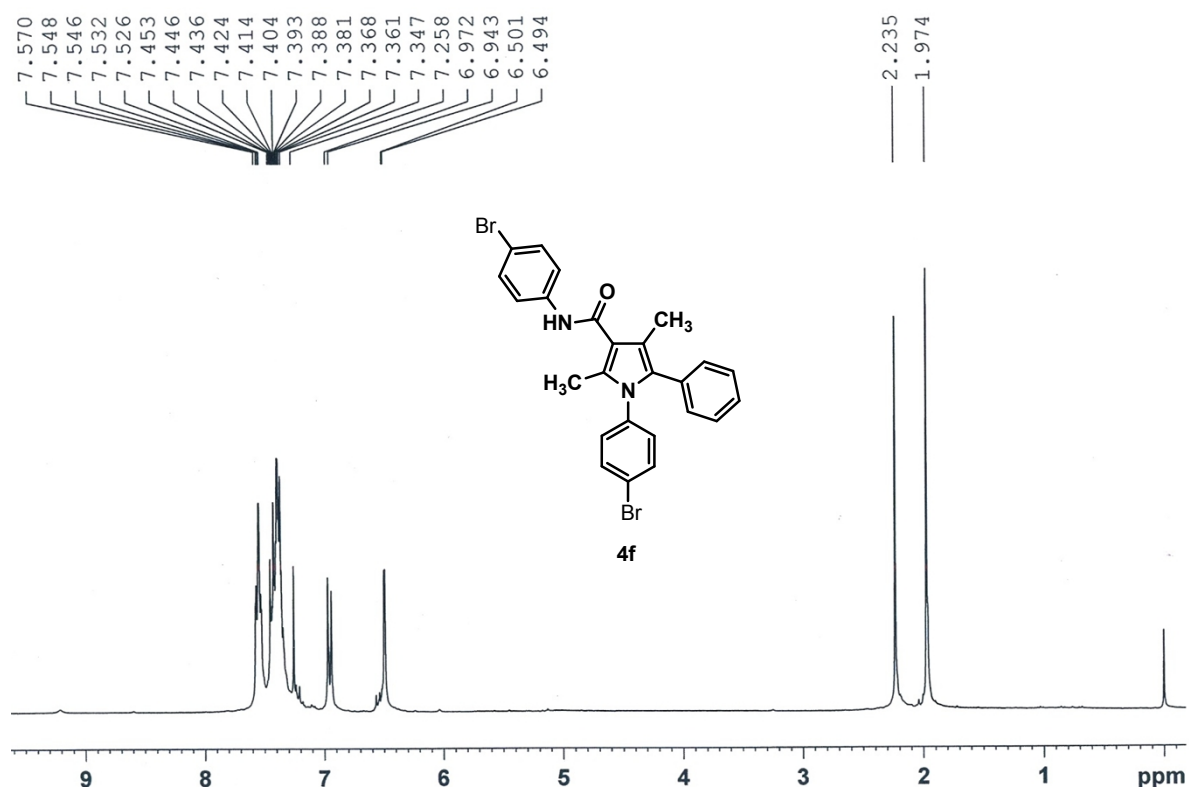

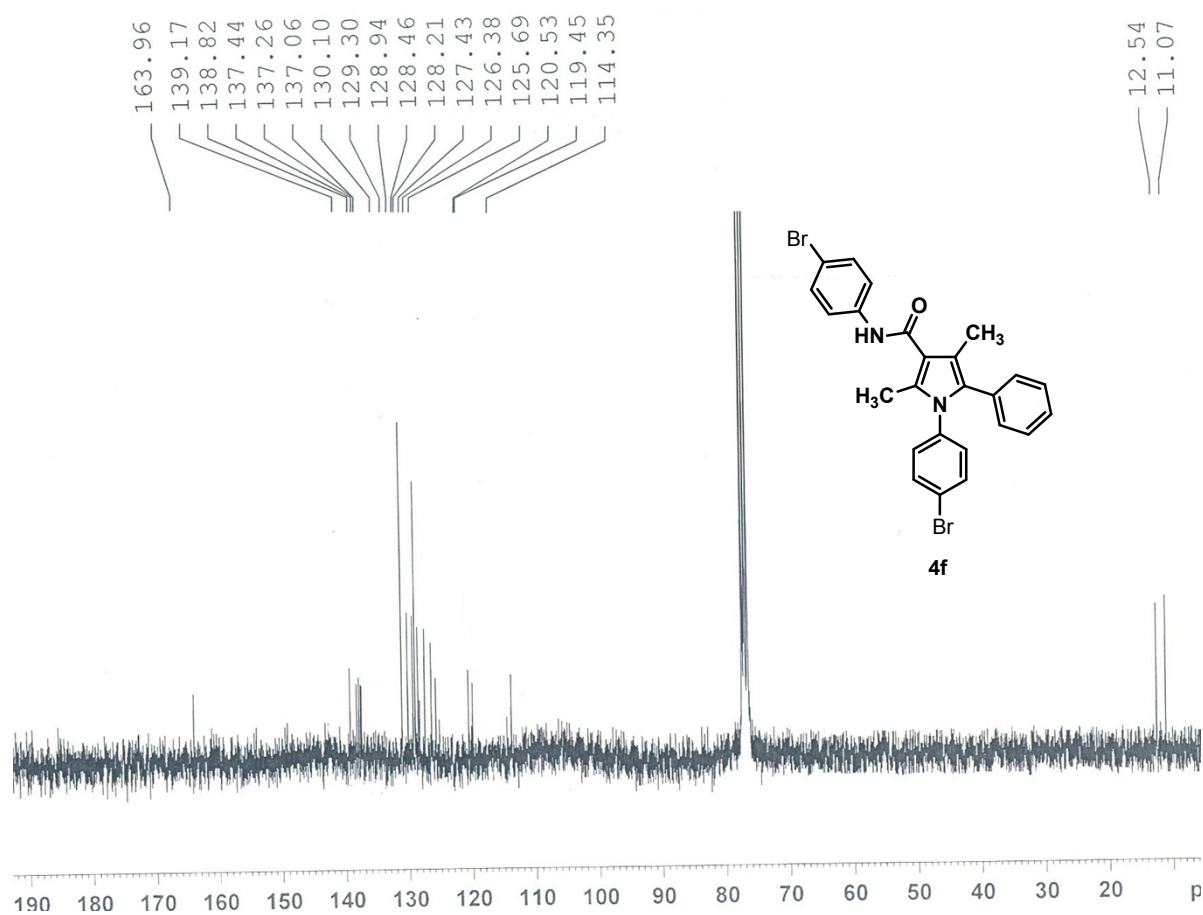

**SI Figure 7:** <sup>1</sup>H and <sup>13</sup>C-NMR spectra of compound **4g**

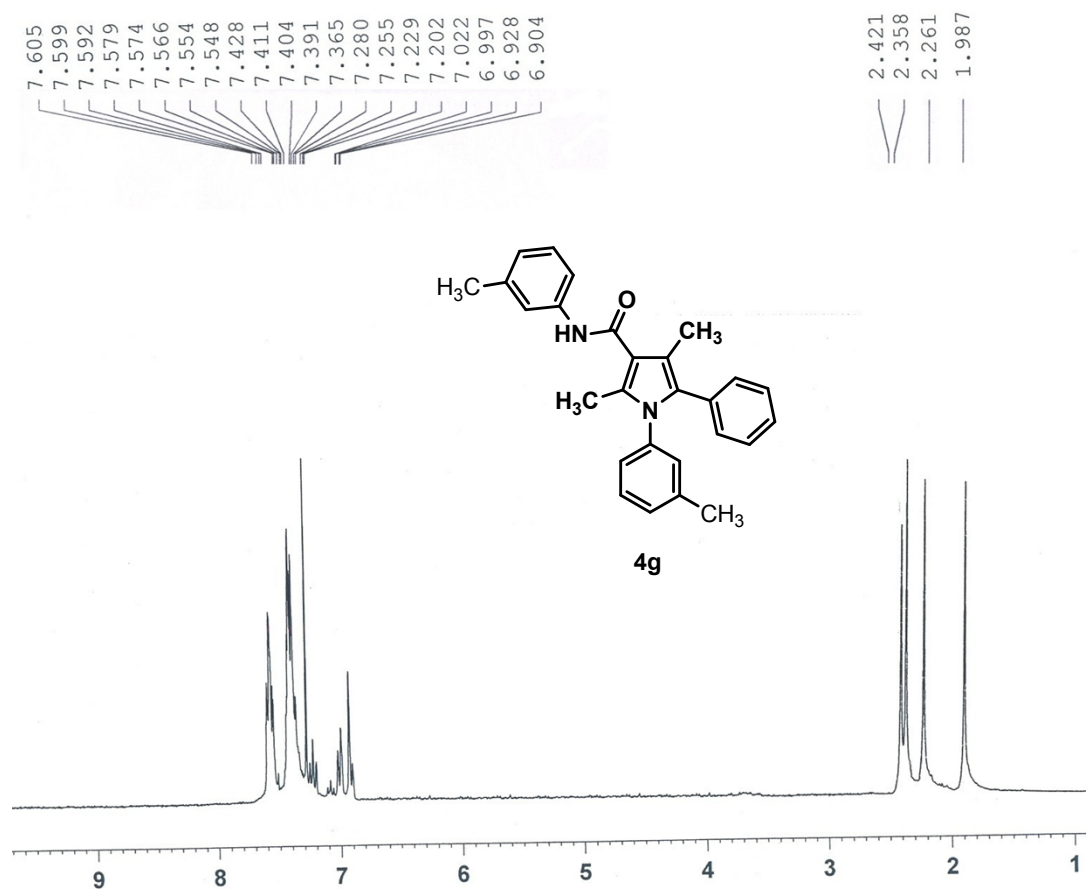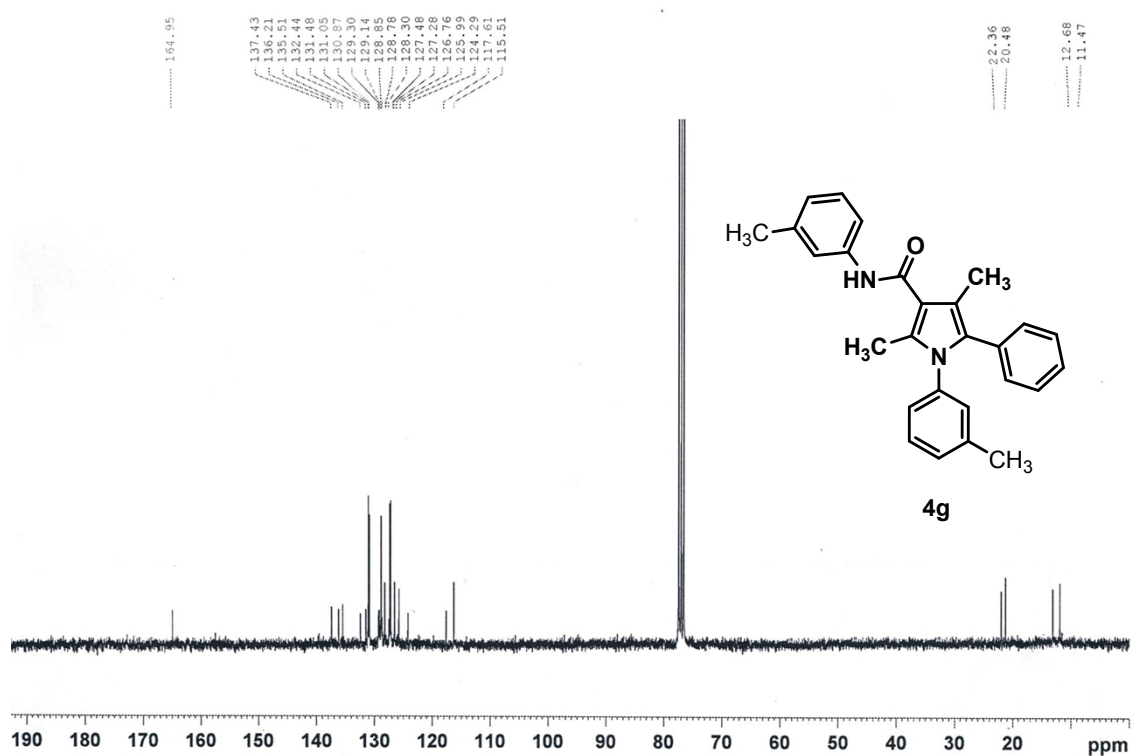

SI Figure 8: <sup>1</sup>H and <sup>13</sup>C-NMR spectra of compound 4h

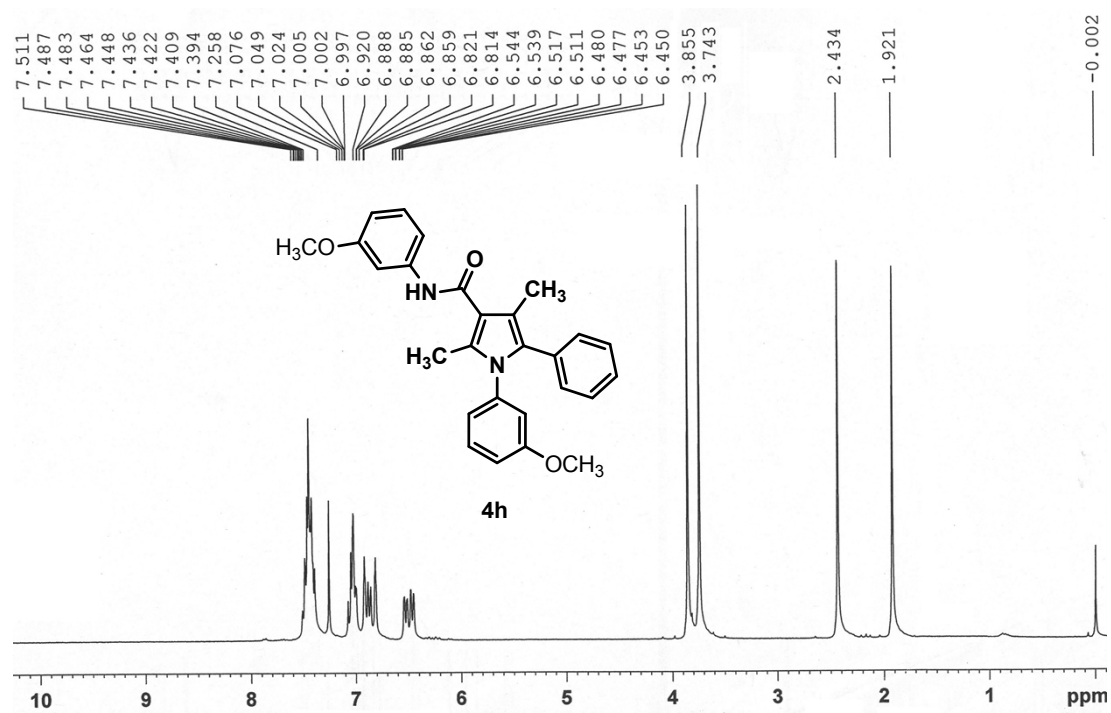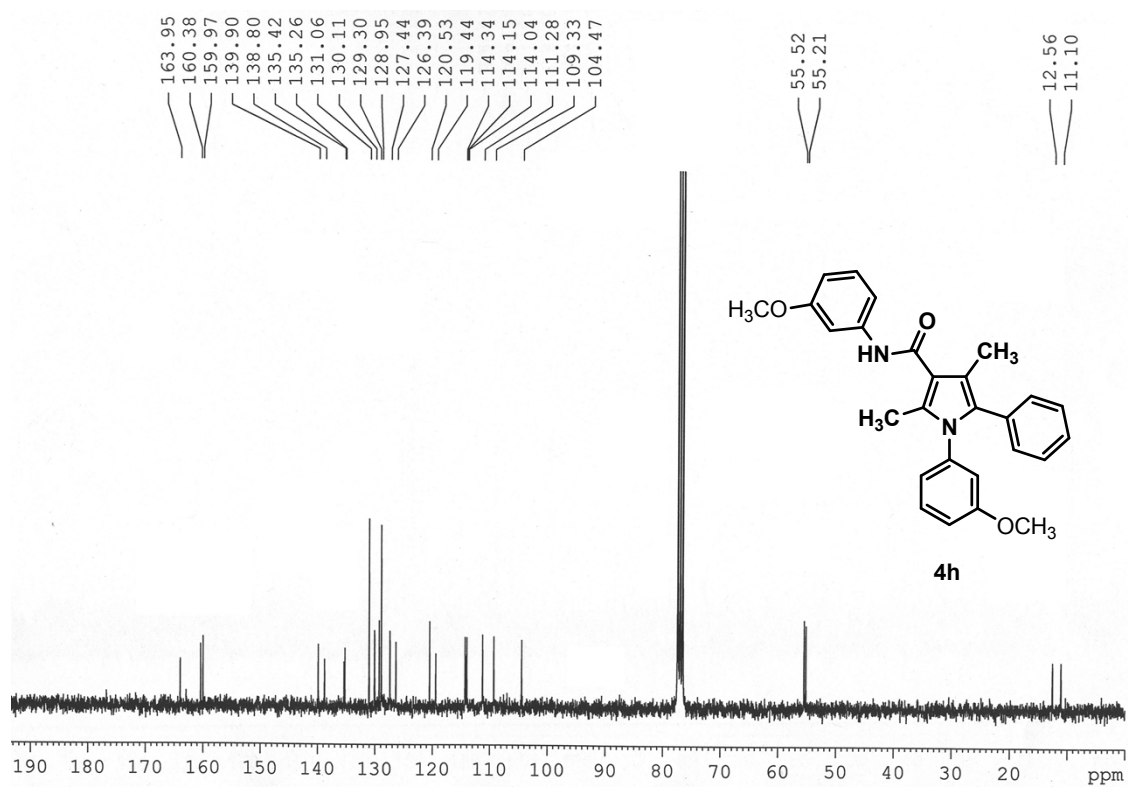

**SI Figure 9:**  $^1\text{H}$  and  $^{13}\text{C}$ -NMR spectra of compound **4i**

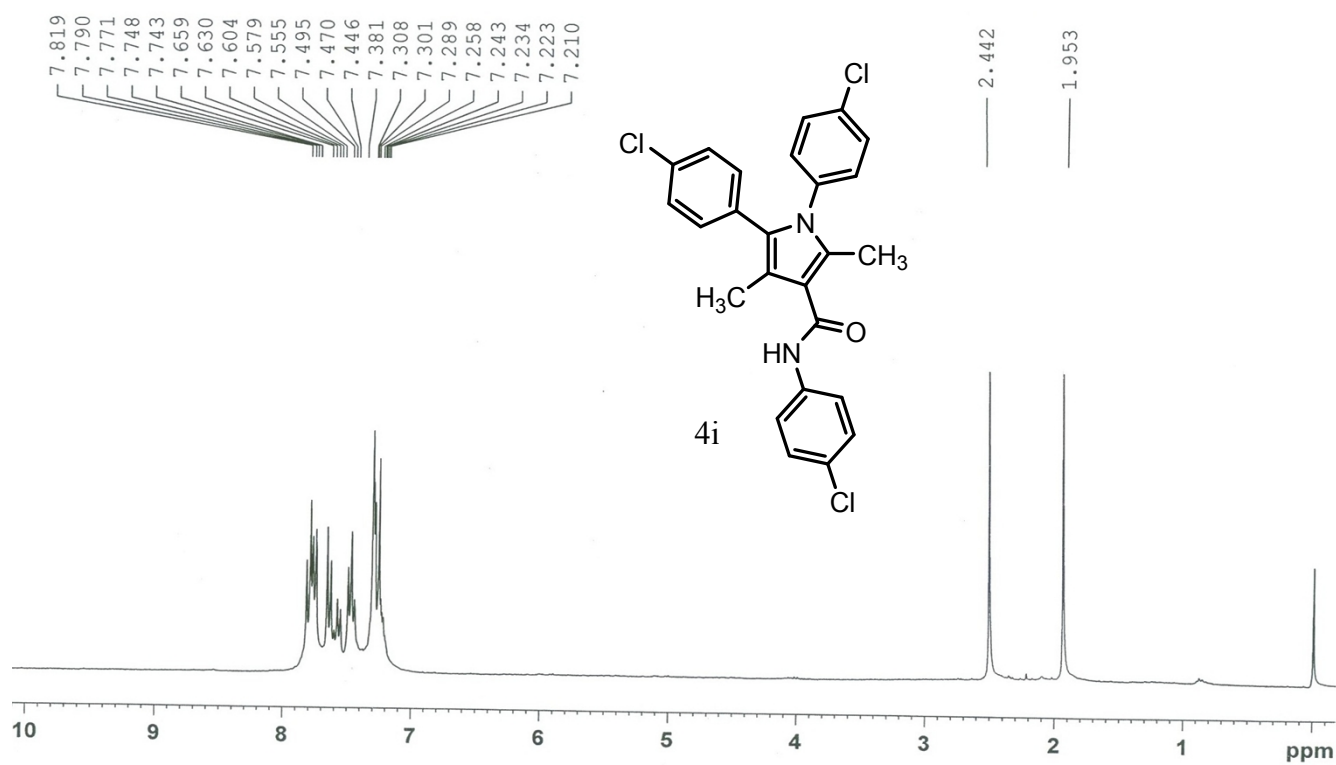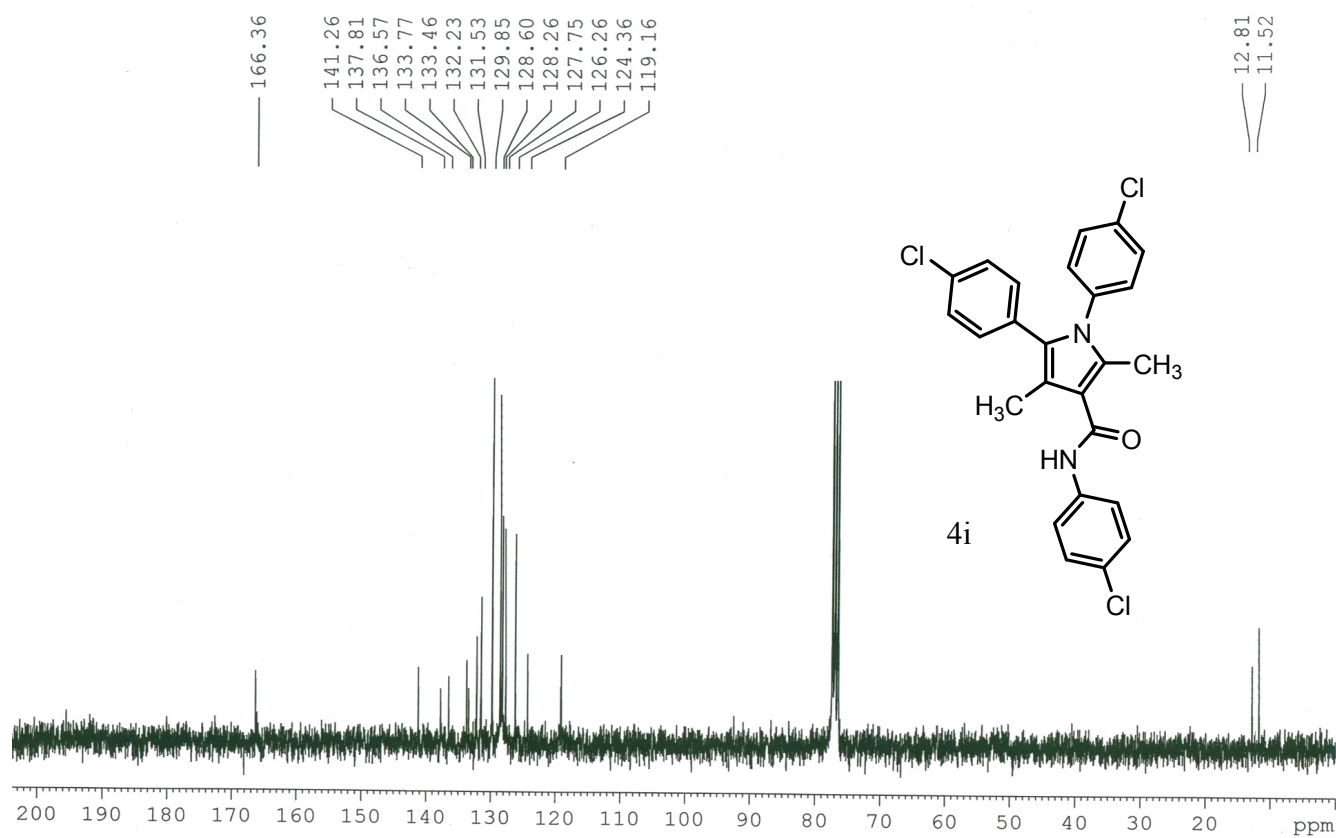

**SI Figure 10:** <sup>1</sup>H and <sup>13</sup>C-NMR spectra of compound 4j

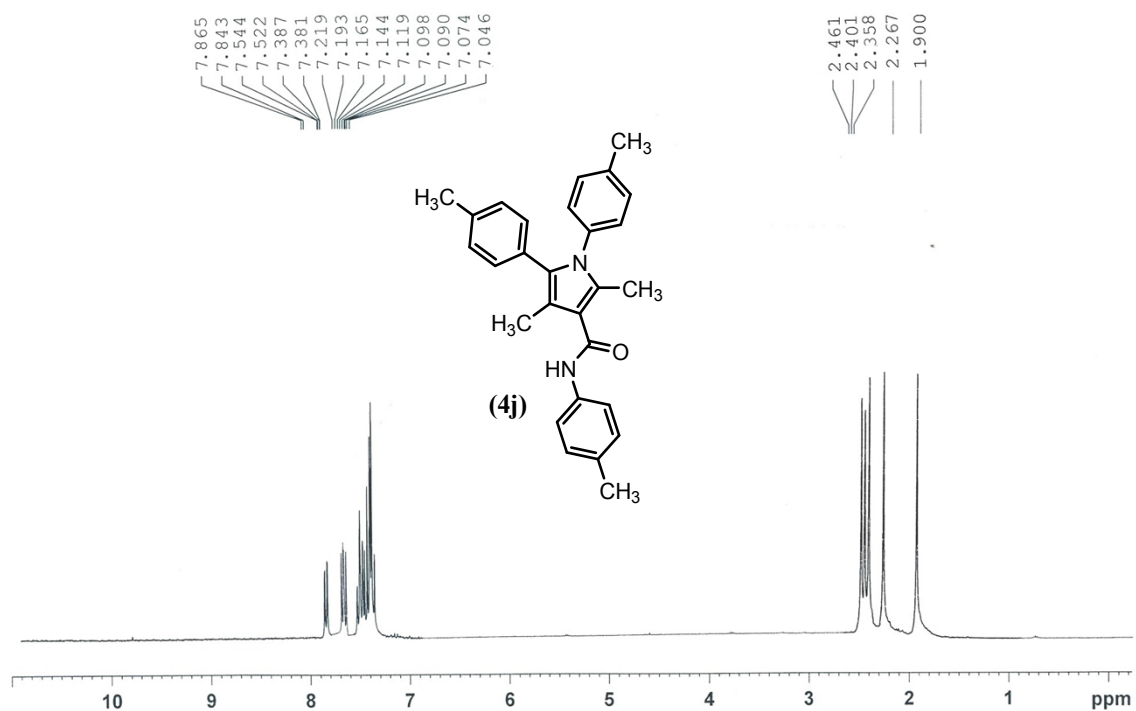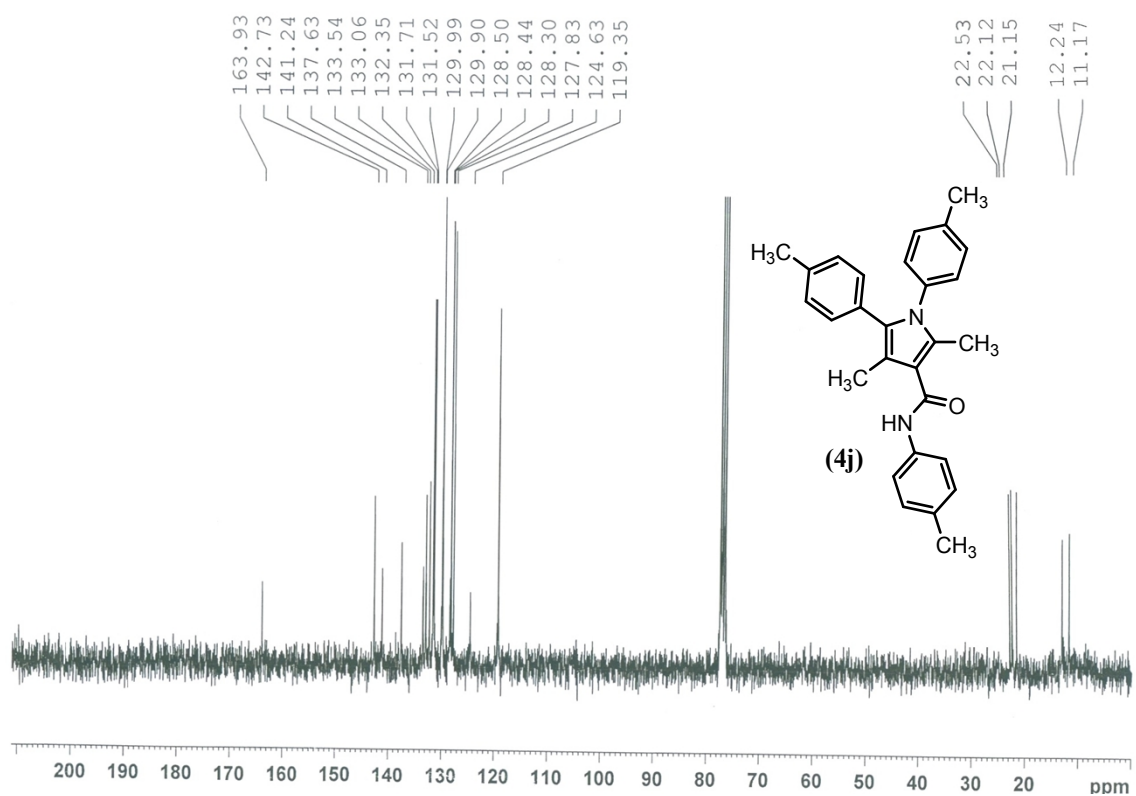

SI Figure 11:  $^1\text{H}$  and  $^{13}\text{C}$ -NMR spectra of compound **4k**

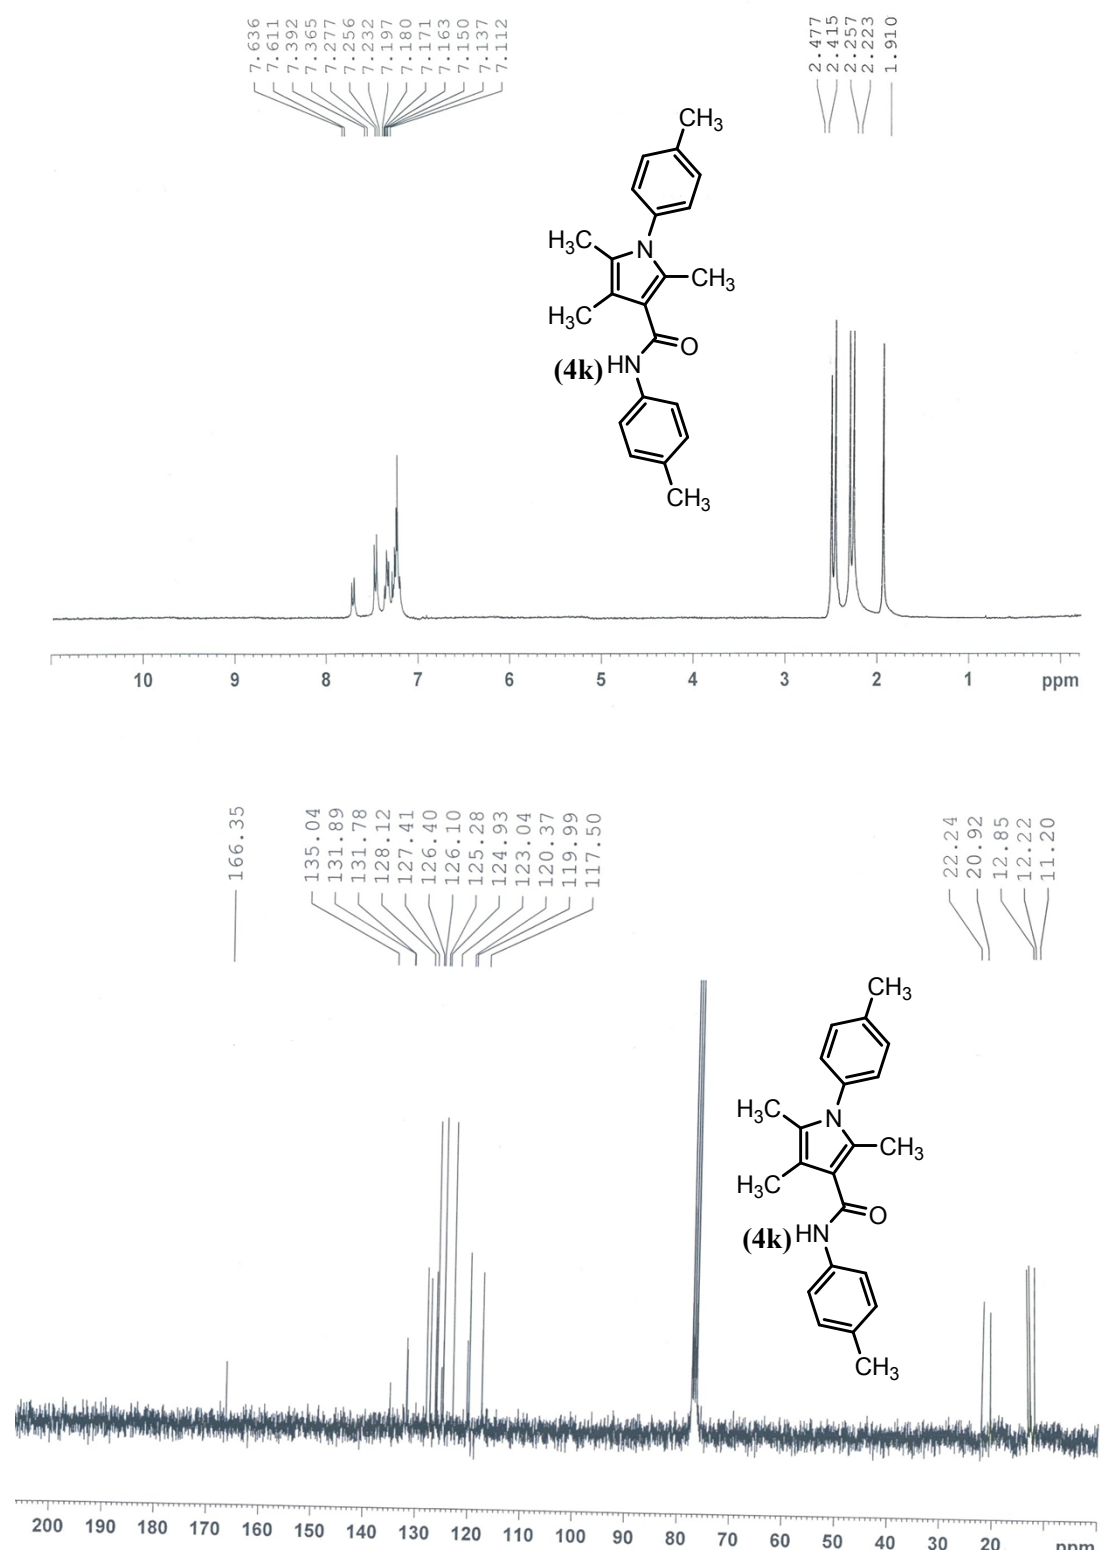

SI Figure 12:  $^1\text{H}$  and  $^{13}\text{C}$ -NMR spectra of compound 4I

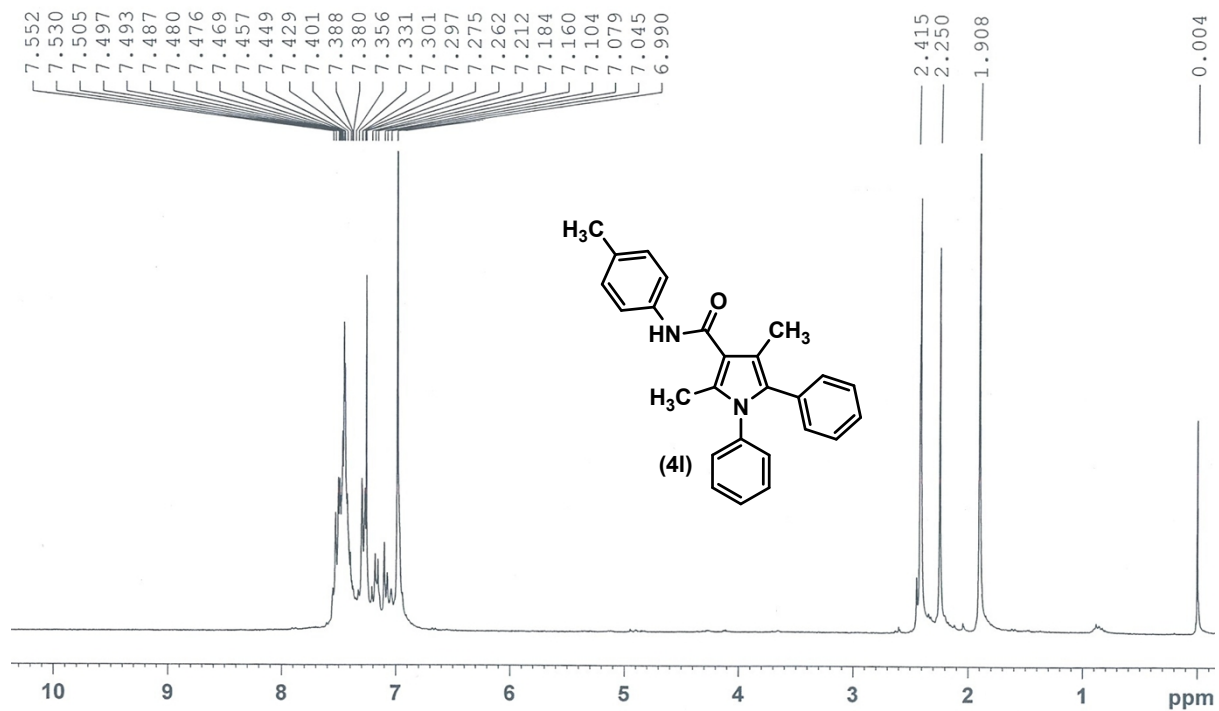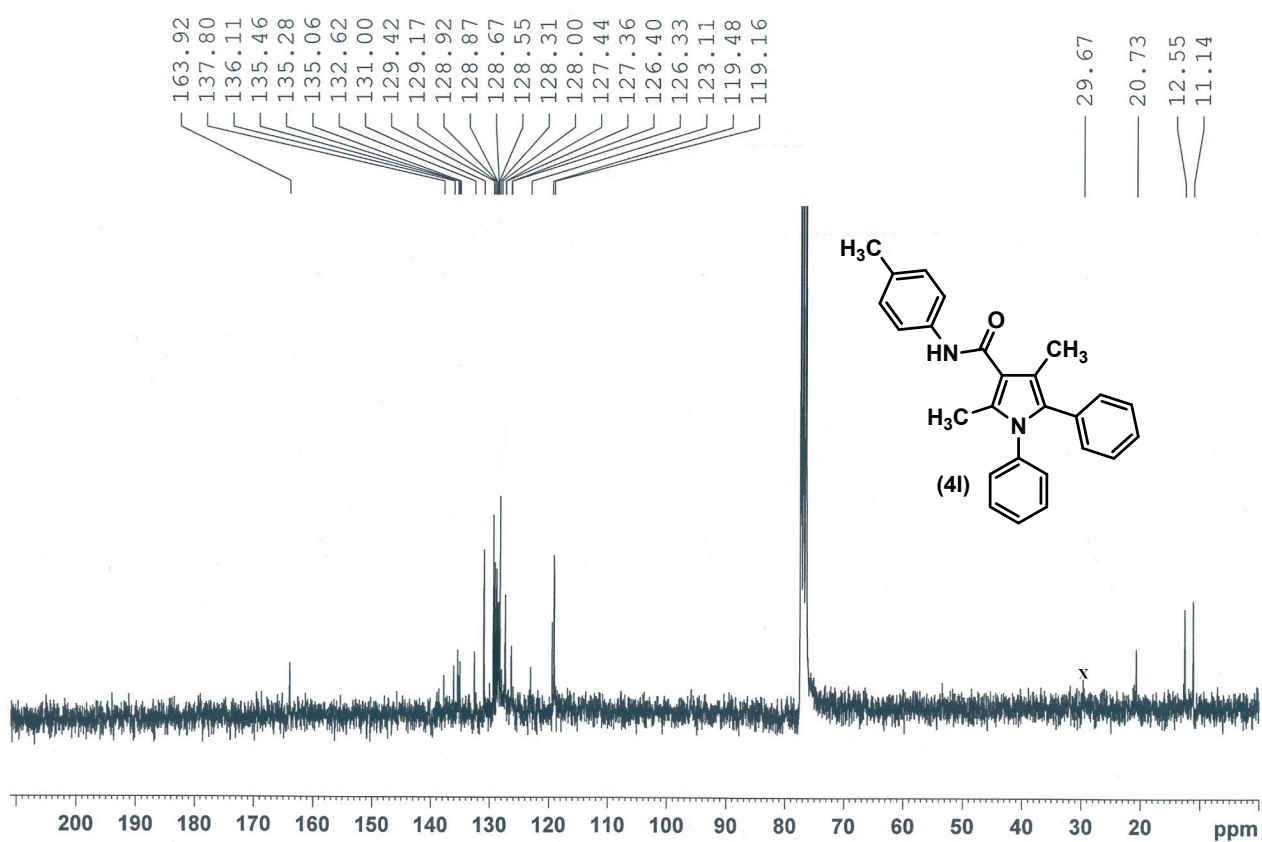

## 7. $^1\text{H}$ and $^{13}\text{C}$ -NMR spectra of the compounds (6d)

SI Figure 11:  $^1\text{H}$  and  $^{13}\text{C}$ -NMR spectra of compound 6d

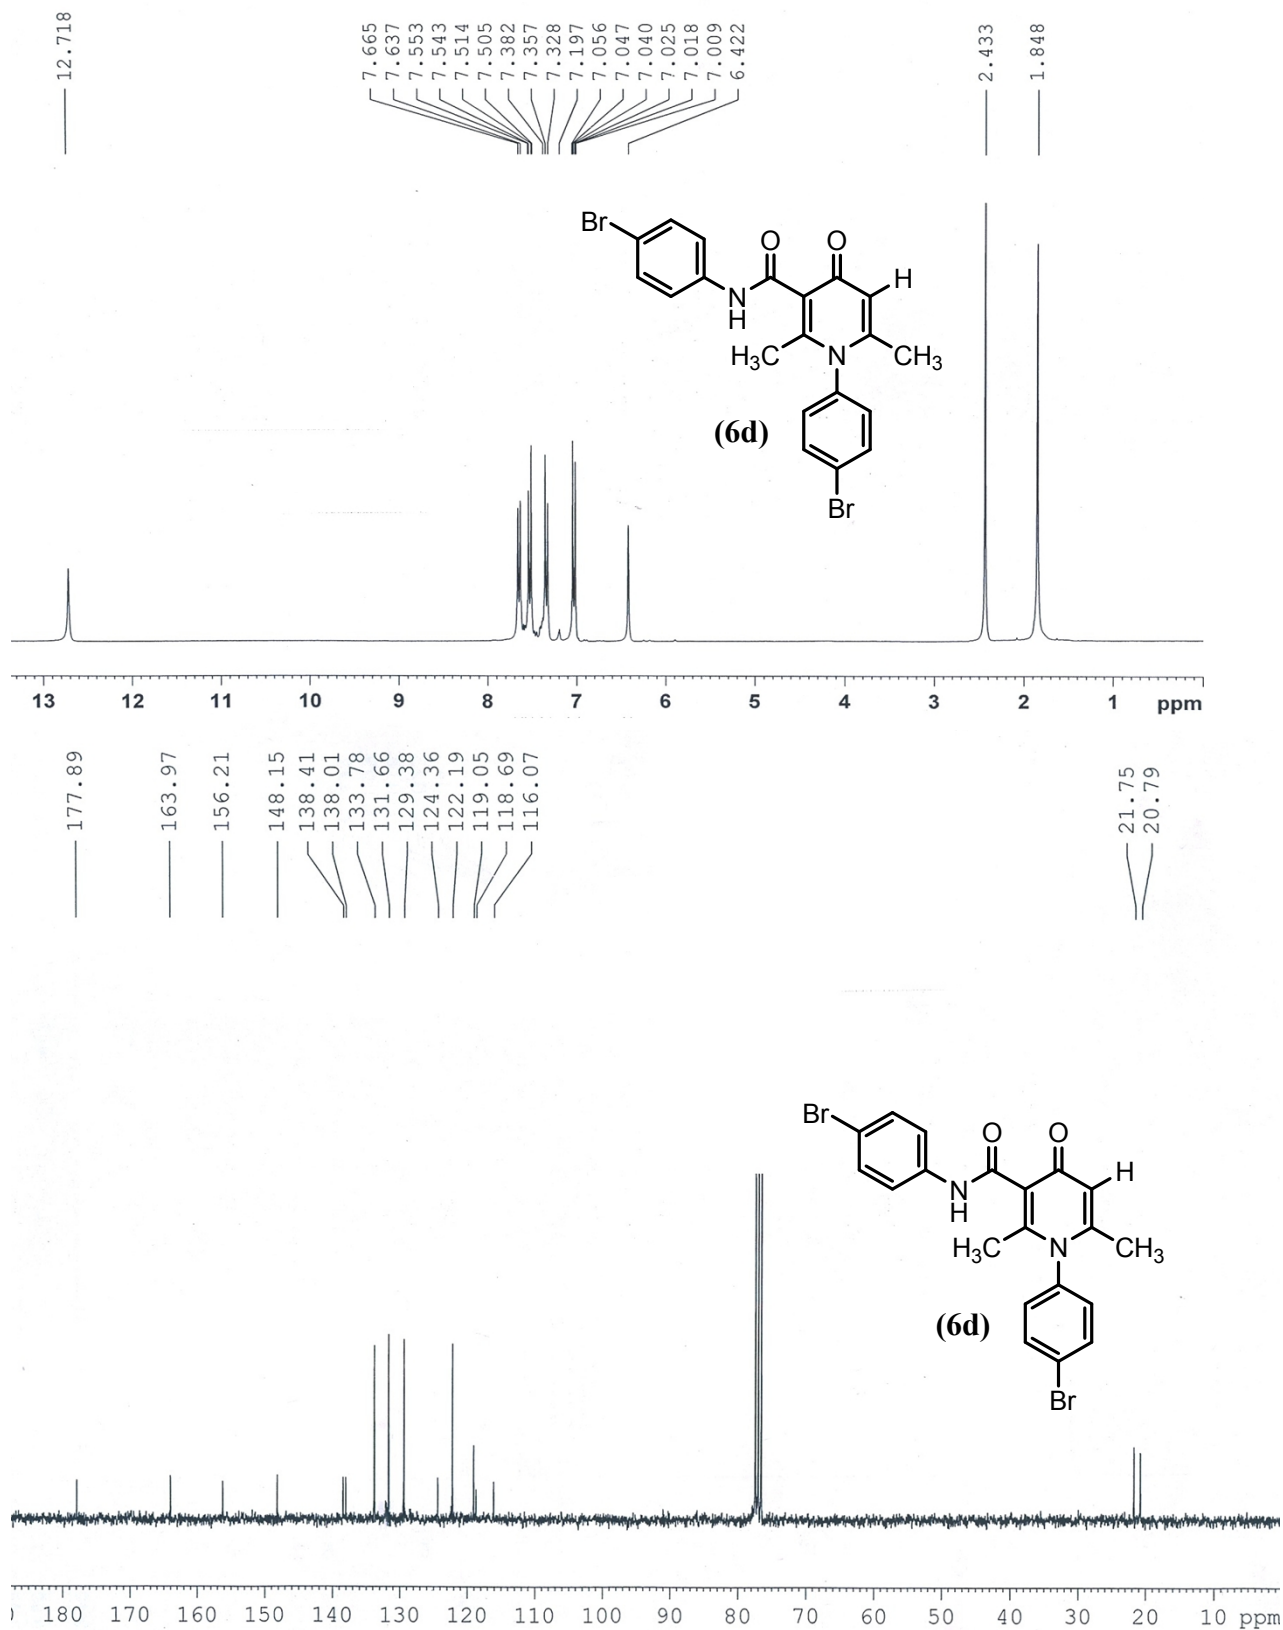

Supplement: c5ra12115a1.pdf [file c5ra12115a1.pdf]
